# Supplementary material for: Unravelling the intrinsic thermal conduction mechanism through phonon transport pathway engineering of long-range ordered block copolymers
Source: Royal Society of Chemistry journal article supplement (doi:10.1039/d6sc01804a), 2026-05-08
Supplement: d6sc01804a1.pdf [file d6sc01804a1.pdf]

## **Electronic supplementary information**

# Unravelling Intrinsic Thermal Conduction Mechanism Through Phonon Transport Pathway Engineering of Long-Range Ordered Block Copolymers

Kuan Zhang, Junliang Zhang,\* Jiahao An, Junwei Gu\*

School of Chemistry and Chemical Engineering, Northwestern Polytechnical  
University, Xi'an, Shaanxi, 710072, P. R. China

\*Corresponding authors: Email: junliang.zhang@nwpu.edu.cn (J. Zhang);  
gjw@nwpu.edu.cn (J. Gu)

## Materials

4-(4-hydroxyphenyl)benzotrile (97%), 6-chlorohexanol (98%), and 11-bromo-1-undecanol (98%), methacryloylchloride (98%), glycidyl methacrylate (GMA, 97%), 4,4'-diaminodiphenylmethane (DDM, 98%), 1,3,5-trioxane (99%), and N,N-dimethylformamide (DMF, analytical grade) were purchased from Shanghai Macklin Biochemical Co., Ltd (Shanghai, China). Triethylamine (TEA, 98%) was supplied by Aladdin Shanghai Co., Ltd. (Shanghai, China). Potassium carbonate ( $K_2CO_3$ , analytical grade), sodium bicarbonate ( $NaHCO_3$ , analytical grade), magnesium sulfate ( $MgSO_4$ , analytical grade), tetrahydrofuran (THF, analytical grade), methanol (MeOH, analytical grade), petroleum ether (analytical grade), and dichloromethane (DCM, analytical grade) were obtained from Guangdong Guanghua Science and Technology Co., Ltd. 4-cyano-4-(dodecylsulfanylthiocarbonyl)sulfanylpentanoic acid (CTA, analytical grade) was purchased from Suzhou Xinjiayuan Chemical Technology Co., Ltd. (Jiangsu, China). 1,4-dioxane (analytical grade) and 2,2'-Azobis(2-methylpropionitrile) (AIBN, analytical grade) was bought from Beijing J&K Co., Ltd. (Beijing, China).

## Characterization

The molecular structure of the samples was characterized by proton and carbon nuclear magnetic resonance ( $^1H$  NMR and  $^{13}C$  NMR, Bruker Avance 400 MHz, Bruker, Germany) spectroscopy. Dimethyl sulfoxide- $d_6$  ( $DMSO-d_6$ ) or deuterated chloroform ( $CDCl_3$ ) was used as solvents with tetramethylsilane

(TMS) as an internal standard.

Fourier transform infrared (FT-IR, Bruker Tensor II, Bruker, Germany) spectroscopy was used to characterize the functional groups of the samples. The characterization method was attenuated total internal reflectance (ATR) with the testing range of 500-4000  $\text{cm}^{-1}$ .

Size exclusion chromatography (SEC, Waters 1515, Waters Corp., USA) was used to determine the number average molar mass ( $M_n$ ), weight average molar mass ( $M_w$ ), and molar mass distribution ( $\mathcal{D}$ ) of the samples using tetrahydrofuran (THF, HPLC grade) as the elution solvent at a flow rate of 1.0 mL/min. The column system was calibrated with polystyrene standards (ranging from 1000 to 10000 g/mol). The sample concentration was 0.15~0.20 wt%, and the sample was filtered through 0.45  $\mu\text{m}$  Nylon syringe filters before injection.

The characteristic thermal temperatures of the samples were characterized using a differential scanning calorimetry (DSC, DSC3, Mettler-Toledo, Switzerland). The heating rate was 10°C/min and the atmosphere was nitrogen.

Wide-Angle X-ray diffraction (WAXD) patterns of the samples were tested using an WAXD (D8 Advance, Bruker, Germany) machine equipped with a Cu-targeted radiation source. The scanning speed was 10°/min with the diffraction angle of  $2\theta = 5^\circ$  to  $60^\circ$ . The step size was 0.02°/step. The testing samples (powders for uncured polymers and isotropic bulk specimens for cured

polymers) were not subjected to any alignment treatment for the measurement.

Small-angle X-ray scattering (SAXS) curves of the samples were tested using a SAXS machine (Xeuss 3.0, France) equipped with a Cu-K $\alpha$  targeted radiation source. The distance from the sample to the detector was 2340 mm. The scattering angle of  $2\theta$  was from  $0.3^\circ$  to  $10^\circ$ . The testing samples (powders for uncured polymers and isotropic bulk specimens for cured polymers) were not subjected to any alignment treatment for the measurement.

The glass transition temperature ( $T_g$ ), melting point temperature ( $T_m$ ), and curing behaviors of the samples were characterized using a differential scanning calorimetry (DSC, DSC1, Mettler-Toledo, Switzerland). The heating rate was  $10^\circ\text{C}/\text{min}$  and the atmosphere was nitrogen.

A hot-stage polarizing optical microscope (POM, WMP-6880, Shanghai Wumo Optical Instrument, China) was used to observe the liquid crystalline behavior of the samples with a heating rate of  $10^\circ\text{C}/\text{min}$ .

A thermal constant analyzer (TPS2200, Hot Disk, Sweden) was used to measure the thermal conductivity of the samples using the modular method according to the standard ISO 22007-2: 2015 at room temperature with a sample size of  $20\text{ mm} \times 20\text{ mm} \times 3\text{ mm}$ . Measurements were repeated five times, and the average result of these five measurements was used for the thermal conductivity of each sample.

The FES model of the encapsulation system was built with SolidWorks, followed by a thermal performance study using ANSYS. Thermal resistance

parameters were extracted in accordance with the JESD51-2A standard, and the thickness of the encapsulation material was set at 2 mm.

The molecular dynamics model was built with Packmol software and the OPLS force field was selected to simulate liquid crystal monomers. Lammmps was used to perform non-equilibrium molecular dynamics simulations (NEMD) and calculate the thermal conductivity of the system. Relaxation optimization of the geometric structure in the micro-canonical ensemble (NVE) was performed at room temperature. Heat flow was formed by a constant exchange rate of atoms in different regions, which was then stabilized into a heat flow and temperature gradient in the Z direction.

## Synthesis of LCx, PLCx<sub>m</sub>-b-PGMA<sub>n</sub>, and PLCx<sub>50</sub>-co-PGMA<sub>50</sub>

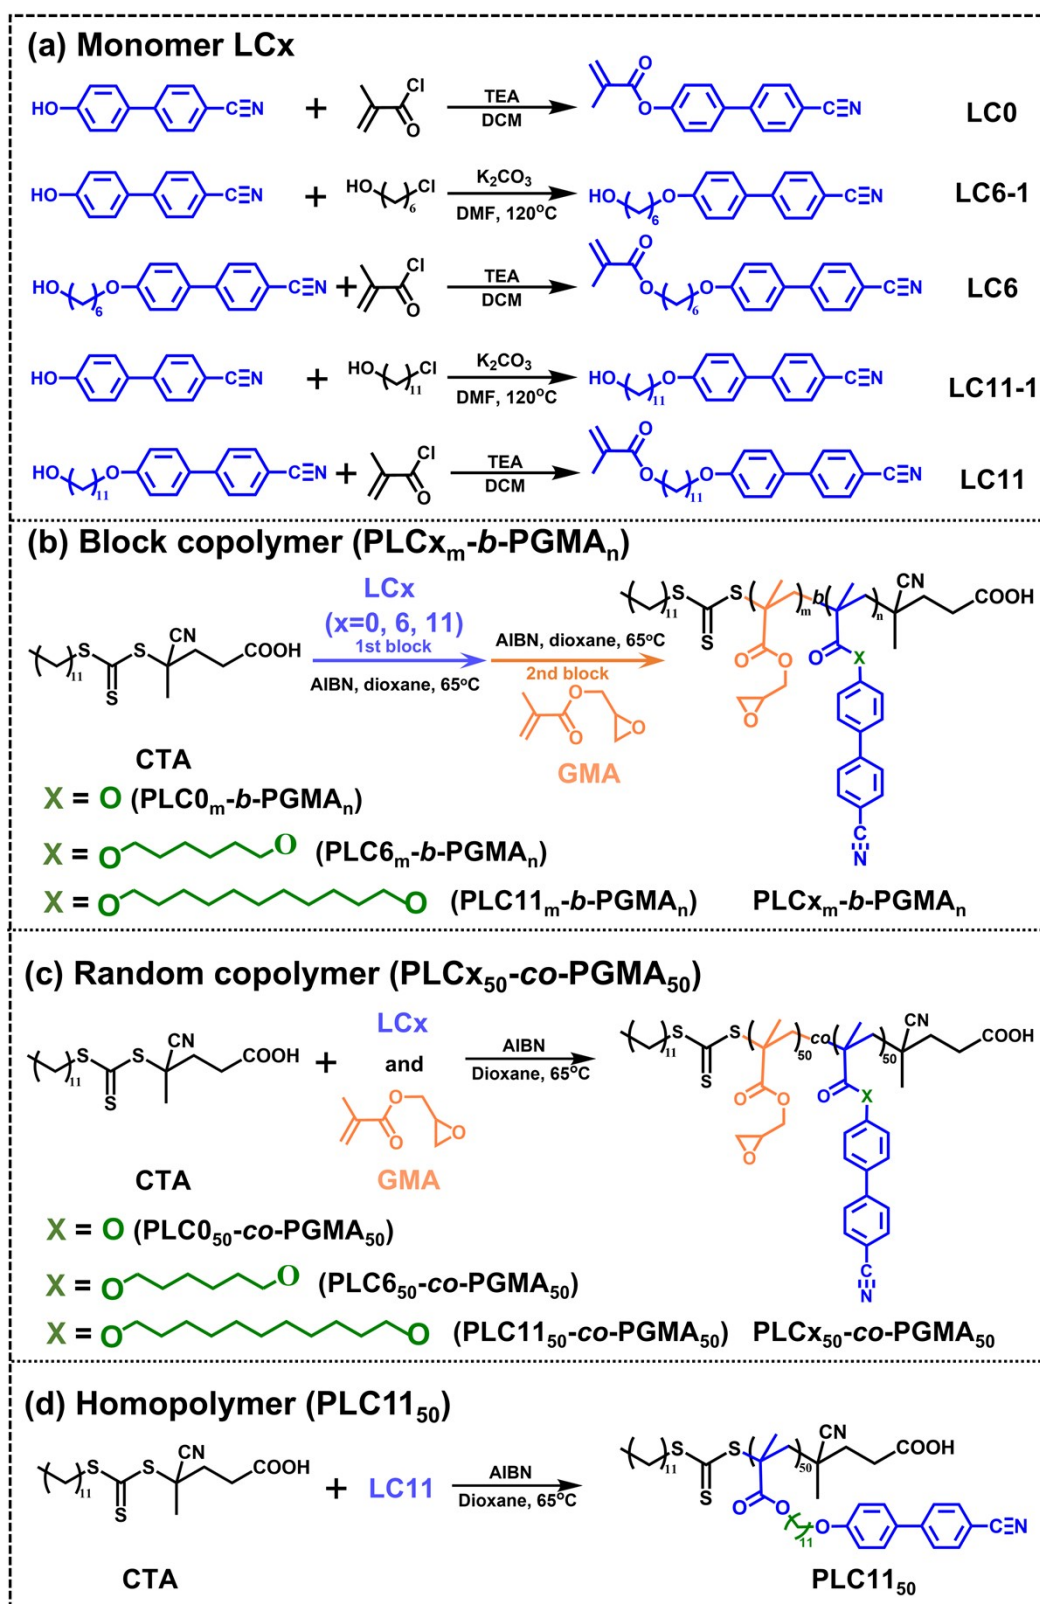

**Scheme S1.** Schemes for the synthesis of (a) LCx ( $x = 0, 6, 11$ ), (b) PLCx<sub>m</sub>-b-PGMA<sub>n</sub>, (c) PLCx<sub>50</sub>-co-PGMA<sub>50</sub>, and (d) PLC11<sub>50</sub>.

**Synthesis of LC0:** 4-(4-hydroxyphenyl)benzonitrile (5.00 g, 25.61 mmol) and TEA (3.11 g, 30.73 mmol) were dissolved in a 500 mL round bottom flask containing ultra-dry THF (100 mL). Methacryloylchloride (3.21 g, 30.73 mmol) was then dissolved in ultra-dry THF (50 mL) and added dropwise to the above solution while cooling in an ice bath. After complete addition, the mixture was allowed to react at room temperature for 24 hours, then was cooled down and washed with aqueous NaHCO<sub>3</sub> solution and water. The organic phase was dried with anhydrous MgSO<sub>4</sub> and evaporated under reduced pressure. The crude product was purified by column chromatography using DCM as eluent to obtain a white solid. The yield of the product was 86.5%. The synthetic route is shown in **Scheme S1a**.

<sup>1</sup>H NMR analysis of LC0 (**Fig. 1a**, 400 MHz, (CD<sub>3</sub>)<sub>2</sub>SO, ppm): δ=7.91 (*dd*, *J*= 13, 7 Hz, -O-C<sub>6</sub>H<sub>4</sub>-C<sub>6</sub>H<sub>4</sub>-C≡N, **f, g**), δ=7.82 (*d*, *J*= 7 Hz, -O-C<sub>6</sub>H<sub>4</sub>-C<sub>6</sub>H<sub>4</sub>-C≡N, **e**), δ=7.32 (*d*, *J*= 7 Hz, -O-C<sub>6</sub>H<sub>4</sub>-C<sub>6</sub>H<sub>4</sub>-C≡N, **e**), δ= 6.31 (*s*, CH<sub>2</sub>=C(CH<sub>3</sub>)-C-, **a**), δ=5.93 (*s*, CH<sub>2</sub>=C(CH<sub>3</sub>)-C-, **b**), δ=2.02 (*s*, CH<sub>2</sub>=C(CH<sub>3</sub>)-C-, **c**). <sup>13</sup>C NMR analysis of LC0 (**Fig. 1b**, 100 MHz, (CD<sub>3</sub>)<sub>2</sub>SO, ppm): δ=165.68, 151.58, 144.23, 136.35, 135.68, 133.35, 128.79, 128.44, 128.04, 123.03, 119.39, 110.56, 18.52.

**Synthesis of LC6:** 4-(4-hydroxyphenyl)benzonitrile (5.00 g, 25.61 mmol), 6-chlorohexanol (5.24 g, 38.35 mmol), and K<sub>2</sub>CO<sub>3</sub> (3.54 g, 25.61 mmol) were dissolved in a 500 mL round bottom flask containing DMF (200 mL). The mixture was stirred at 120°C for 8 hours. After reaction, an appropriate amount

of water was added to the reaction mixture to precipitate the crude product, which was filtered and washed with water, and dried in a vacuum oven at 40°C. The obtained solid was recrystallized with methanol to obtain LC6-1 with a yield of 75.2%. Then, LC6-1 (4.00 g, 13.54 mmol) and TEA (1.64 g, 16.25 mmol) were dissolved in a 500 mL round bottom flask containing ultra-dry THF (100 mL). Then methacryloylchloride (1.70 g, 16.25 mmol) was dissolved in ultra-dry THF (50 mL) and added dropwise to the above solution while cooled in an ice bath. After complete addition, the mixture was allowed to react at room temperature for 24 hours, then was cooled down and washed with aqueous NaHCO<sub>3</sub> solution and water. The organic phase was dried with anhydrous MgSO<sub>4</sub> and evaporated under reduced pressure. The crude product was purified by column chromatography using DCM as eluent to get a white solid. The yield of the product was 68.4%. The synthetic route is shown in **Scheme S1a**.

<sup>1</sup>H NMR analysis of LC6 (**Fig. 1a**, 400 MHz, (CD<sub>3</sub>)<sub>2</sub>SO, ppm): δ=7.82 (*dd*, *J*= 16, 7 Hz, -O-C<sub>6</sub>H<sub>4</sub>-C<sub>6</sub>H<sub>4</sub>-C≡N, **l, m**), δ=7.67 (*d*, *J*= 7 Hz, -O-C<sub>6</sub>H<sub>4</sub>-C<sub>6</sub>H<sub>4</sub>-C≡N, **k**), δ=7.02 (*d*, *J*= 7 Hz, -O-C<sub>6</sub>H<sub>4</sub>-C<sub>6</sub>H<sub>4</sub>-C≡N, **e**), δ= 6.01 (*s*, CH<sub>2</sub>=C(CH<sub>3</sub>)-C-, **a**), δ=5.64 (*s*, CH<sub>2</sub>=C(CH<sub>3</sub>)-C-, **b**), δ=4.09 (*t*, *J*= 5 Hz, -O-CH<sub>2</sub>-CH<sub>2</sub>-CH<sub>2</sub>-CH<sub>2</sub>-CH<sub>2</sub>-CH<sub>2</sub>-O-C<sub>6</sub>H<sub>4</sub>-, **i**), δ=3.99 (*t*, *J*= 5 Hz, -O-CH<sub>2</sub>-CH<sub>2</sub>-CH<sub>2</sub>-CH<sub>2</sub>-CH<sub>2</sub>-CH<sub>2</sub>-O-C<sub>6</sub>H<sub>4</sub>-, **d**), δ=1.87 (*s*, CH<sub>2</sub>=C(CH<sub>3</sub>)-C-, **c**), δ=1.72 (*m*, -O-CH<sub>2</sub>-CH<sub>2</sub>-CH<sub>2</sub>-CH<sub>2</sub>-CH<sub>2</sub>-CH<sub>2</sub>-O-C<sub>6</sub>H<sub>4</sub>-, **h**) δ=1.62 (*m*, -O-CH<sub>2</sub>-CH<sub>2</sub>-CH<sub>2</sub>-CH<sub>2</sub>-CH<sub>2</sub>-CH<sub>2</sub>-O-C<sub>6</sub>H<sub>4</sub>-, **e**), δ=1.43 (*m*, -O-CH<sub>2</sub>-CH<sub>2</sub>-CH<sub>2</sub>-CH<sub>2</sub>-CH<sub>2</sub>-CH<sub>2</sub>-O-

C<sub>6</sub>H<sub>4</sub>-, **f, g**). <sup>13</sup>C NMR analysis of LC6 (**Fig. 1b**, 100 MHz, (CD<sub>3</sub>)<sub>2</sub>SO, ppm):  
δ=167.01, 159.81, 144.71, 136.58, 133.20, 130.70, 128.72, 127.24,  
125.92, 119.45, 115.49, 110.16, 67.95, 64.69, 28.98, 28.48, 25.67, 25.42,  
18.45.

**Synthesis of LC11:** 4-(4-hydroxyphenyl)benzotrile (5.00 g, 25.61 mmol), 11-bromo-1-undecanol (9.65 g, 38.42 mmol), and K<sub>2</sub>CO<sub>3</sub> (3.54 g, 25.61 mmol) were dissolved in a 500 mL round bottom flask containing DMF (200 mL). The mixture was stirred at 120°C for 8 hours. After reaction, an appropriate amount of water was added to the reaction mixture to precipitate the crude product, which was filtered and washed with water, and dried in a vacuum drying oven at 40°C. The obtained solid was recrystallized with methanol to obtain the LC11-1 with a yield of 64.7%. Then, LC11-1 (5.00 g, 13.68 mmol) and TEA (1.66 g, 16.42 mmol) were dissolved in a 500 mL round bottom flask containing ultra-dry THF (100 mL). Then methacryloylchloride (1.72 g, 16.42 mmol) was dissolved in ultra-dry THF (50 mL) and added dropwise to the above solution while cooled in an ice bath. After complete addition, the reaction mixture was allowed to react at room temperature for 24 hours, then was cooled down and washed with aqueous NaHCO<sub>3</sub> solution and water. The organic phase was dried with anhydrous MgSO<sub>4</sub> and evaporated under reduced pressure. The crude product was purified by column chromatography using DCM as eluent to get a white solid. The yield of the product was 56.7%. The synthetic route is shown in **Scheme S1a**.

$^1\text{H}$  NMR analysis of LC11 (**Fig. 1a**, 400 MHz,  $(\text{CD}_3)_2\text{SO}$ , ppm):  $\delta=7.85$  (*dd*,  $J= 16, 7$  Hz,  $-\text{O}-\text{C}_6\text{H}_4-\text{C}_6\text{H}_4-\text{C}\equiv\text{N}$ , **k, l**),  $\delta=7.69$  (*d*,  $J= 7$  Hz,  $-\text{O}-\text{C}_6\text{H}_4-\text{C}_6\text{H}_4-\text{C}\equiv\text{N}$ , **j**),  $\delta=7.04$  (*d*,  $J= 7$  Hz,  $-\text{O}-\text{C}_6\text{H}_4-\text{C}_6\text{H}_4-\text{C}\equiv\text{N}$ , **i**),  $\delta= 6.01$  (*s*,  $\text{C}=\text{C}(\text{CH}_3)-\text{C}-$ , **a**),  $\delta=5.66$  (*s*,  $\text{C}=\text{C}(\text{CH}_3)-\text{C}-$ , **b**),  $\delta=4.07$  (*t*,  $J= 5$  Hz,  $-\text{O}-\text{CH}_2-\text{CH}_2-(\text{CH}_2)_7-\text{CH}_2-\text{C}-\text{O}-\text{C}_6\text{H}_4-$ , **h**),  $\delta=4.01$  (*t*,  $J= 5$  Hz,  $-\text{O}-\text{CH}_2-\text{CH}_2-(\text{CH}_2)_7-\text{CH}_2-\text{CH}_2-\text{O}-\text{C}_6\text{H}_4-$ , **d**),  $\delta=1.87$  (*s*,  $\text{CH}_2=\text{C}(\text{CH}_3)-\text{C}-$ , **c**),  $\delta=1.72$  (*m*,  $-\text{O}-\text{CH}_2-\text{CH}_2-(\text{CH}_2)_7-\text{CH}_2-\text{C}-\text{O}-\text{C}_6\text{H}_4-$ , **h**)  $\delta=1.59$  (*m*,  $-\text{O}-\text{CH}_2-\text{CH}_2-(\text{CH}_2)_7-\text{CH}_2-\text{CH}_2-\text{O}-\text{C}_6\text{H}_4-$ , **g**),  $\delta=1.41, 1.25$  (*m, m*,  $-\text{O}-\text{CH}_2-\text{CH}_2-(\text{CH}_2)_7-\text{CH}_2-\text{CH}_2-\text{O}-\text{C}_6\text{H}_4-$ , **f**).  $^{13}\text{C}$  NMR analysis of LC11 (**Fig. 1b**, 100 MHz,  $(\text{CD}_3)_2\text{SO}$ , ppm):  $\delta=167.02, 159.84, 144.74, 136.48, 133.24, 130.70, 128.76, 127.27, 125.98, 119.48, 115.54, 109.55, 68.05, 64.74, 29.06, 28.52, 25.85, 18.46$ .

**Synthesis of PLC<sub>x</sub><sub>m</sub>-b-PGMA<sub>n</sub> (taking PLC11<sub>50</sub>-b-PGMA<sub>50</sub> as an example):** CTA (46.56 mg, 0.12 mmol), LC11 (2.5 g, 5.77 mmol), AIBN (1.89 mg, 0.012 mmol), 1,3,5-trioxane (internal standard, 0.04 g), and 1,4-dioxane (2.88 mL) were added into a 25 mL round bottom flask. The flask was sealed with a rubber septum and degassed by bubbling nitrogen for 15 minutes and then put in an oil bath of 65°C until LC11 was completely polymerized, yielding the first block polymer. Then, AIBN (2.39 mg, 0.014 mmol), GMA (0.82 g, 5.77 mmol), and 1,3,5-triazine (0.04 g, internal standard) were introduced into the reaction mixture of the first block, stirred thoroughly, sealed with a rubber septum, and bubbled with nitrogen for 15 minutes. The flask containing the reaction mixture was placed in a 65°C oil bath and stirred until GMA reached

the full conversion. The reaction mixture was then diluted with an appropriate amount of dichloromethane (DCM) and added dropwise to MeOH to precipitate the polymer. The obtained solid was washed several times with MeOH and dried at 40°C for 24 hours under reduced pressure to afford PLC11<sub>50</sub>-*b*-PGMA<sub>50</sub> as a light-yellow powder. The synthetic route is shown in **Scheme S1b** and the specific amounts of substrate are detailed in **Table S1-3**.

**Synthesis of PLC<sub>x</sub><sub>50</sub>-co-PGMA<sub>50</sub> (exemplified by PLC11<sub>50</sub>-co-PGMA<sub>50</sub>):**

CTA (46.56 mg, 0.12 mmol), LC11 (2.50 g, 5.77 mmol), GMA (0.82 g, 5.77 mmol), AIBN (1.89 mg, 0.012 mmol), 1,3,5-trioxane (internal standard, 0.04 g), and 1,4-dioxane (5.7 mL) were added into a 25 ml round bottom flask. The flask was sealed with a rubber septum and degassed by bubbling nitrogen for 15 minutes and then put in an oil bath of 65°C until the LC11 and GMA were completely converted. The reaction mixture was then diluted with an appropriate amount of dichloromethane (DCM) and added dropwise to MeOH to precipitate the polymer. The obtained solid was washed several times with MeOH and dried at 40°C for 24 hours under reduced pressure to afford PLC11<sub>50</sub>-co-PGMA<sub>50</sub> as a light-yellow powder. The synthetic route is shown in **Scheme S1c**, and the specific amounts of substrate are detailed in **Table S3**.

**Synthesis of PLC11<sub>50</sub>:** CTA (46.56 mg, 0.12 mmol), LC11 (2.5 g, 5.77 mmol), AIBN (1.89 mg, 0.012 mmol), 1,3,5-trioxane (internal standard, 0.04 g), and 1,4-dioxane (2.88 mL) were added into a 25 mL round bottom flask. The flask was sealed with a rubber septum and degassed by bubbling nitrogen for

15 minutes and then put in an oil bath of 65°C until LC11 was completely polymerized. The reaction mixture was then diluted with an appropriate amount of dichloromethane (DCM) and added dropwise to MeOH to precipitate the polymer. The obtained solid was washed several times with MeOH and dried at 40°C for 24 hours under reduced pressure to afford PLC11<sub>50</sub> as a light-yellow powder. The synthetic route is shown in **Scheme S1d**

#### **Preparation of cured PLC<sub>x<sub>m</sub></sub>-*b*-PGMA<sub>n</sub> (B-ER<sub>x<sub>m-n</sub></sub>)**

PLC<sub>x<sub>m</sub></sub>-*b*-PGMA<sub>n</sub> and a certain amount of 4,4'-diaminodiphenylmethane (DDM, the molar ratio of amino groups in DDM to epoxy groups in PLC<sub>x<sub>m</sub></sub>-*b*-PGMA<sub>n</sub> was 1:2) were dissolved in an appropriate amount of dichloromethane (DCM) to ensure thorough mixing. DCM was then removed using a rotary evaporator and the resulting mixture was dried in an oven at 40°C for 24 hours. The dried mixture was then pressed into the desired shape and size using a mold at room temperature under 10 MPa pressure and pre-cured at the beginning temperature of the exothermic peak of the curing reaction for 2 hours, then post-cured for 2 hours at the peak temperature of the exothermic peak of the curing reaction, yielding the cured epoxies B-ER<sub>x<sub>m-n</sub></sub>.

FT-IR analysis of LCx (**Fig. 1c**): LC0 showed no stretching vibration peaks of methylene groups in the 3012-2798 cm<sup>-1</sup> range while a stretching vibration peak of the cyano group was observed at 2227 cm<sup>-1</sup>. At 1601 cm<sup>-1</sup>, there was a stretching vibration peak of the carbon-carbon double bond. Compared with LC6 and LC11, the stretching vibration of the ether bond was suppressed and

showed a red shift to 1252-1149  $\text{cm}^{-1}$ . At 1149-1050  $\text{cm}^{-1}$ , there was a bending vibration peak of the ether bond. The stretching vibration peak of the ortho-substituted benzene ring was observed at 842-745  $\text{cm}^{-1}$ . The peak at 3012-2798  $\text{cm}^{-1}$  in LC6 was attributed to the stretching vibration of the methylene group. The peak at 2227  $\text{cm}^{-1}$  was ascribed to the stretching vibration of the cyano group. The peak at 1601  $\text{cm}^{-1}$  was attributed to the stretching vibration of the carbon-carbon double bond. The peaks at 1311-1224  $\text{cm}^{-1}$  were attributed to the stretching vibrations of the ether bond and the peaks at 1224-1090  $\text{cm}^{-1}$  were attributed to the bending vibrations of the ether bond. The stretching vibration peak of the para-substituted benzene ring was at 842-745  $\text{cm}^{-1}$ . The peak of LC11 at 3012-2798  $\text{cm}^{-1}$  was attributed to the stretching vibration of the methylene group. At 2227  $\text{cm}^{-1}$ , the peak corresponded to the stretching vibration of the cyano group. The peak at 1601  $\text{cm}^{-1}$  corresponded to the stretching vibration of the carbon-carbon double bond. At 1339-1217  $\text{cm}^{-1}$ , the peaks corresponded to the stretching vibrations of the ether bond. At 1217-1090  $\text{cm}^{-1}$ , the peaks corresponded to the bending vibrations of the ether bond. The stretching vibration peak of the para-substituted benzene ring was at 842-745  $\text{cm}^{-1}$ . Additionally, the characteristic hydroxyl peaks at 3504-3111  $\text{cm}^{-1}$  were absent in LC0, LC6, and LC11, indicating that the hydroxyl groups were completely substituted. The FT-IR results further confirmed the successful synthesis of LCx.

**Table S1.** Experimental conditions for the synthesis and characterization data of PLC0<sub>m</sub>-*b*-PGMA<sub>n</sub>.

|                                                   | PLC0 <sub>5</sub> - <i>b</i> -PGMA <sub>50</sub> |                       | PLC0 <sub>25</sub> - <i>b</i> -PGMA <sub>50</sub> |                       | PLC0 <sub>25</sub> - <i>b</i> -PGMA <sub>25</sub> |                       | PLC0 <sub>50</sub> - <i>b</i> -PGMA <sub>50</sub> |                       | PLC0 <sub>50</sub> - <i>b</i> -PGMA <sub>25</sub> |                       | PLC0 <sub>50</sub> - <i>b</i> -PGMA <sub>5</sub> |                       |
|---------------------------------------------------|--------------------------------------------------|-----------------------|---------------------------------------------------|-----------------------|---------------------------------------------------|-----------------------|---------------------------------------------------|-----------------------|---------------------------------------------------|-----------------------|--------------------------------------------------|-----------------------|
|                                                   | 1 <sup>st</sup> block                            | 2 <sup>nd</sup> block | 1 <sup>st</sup> block                             | 2 <sup>nd</sup> block | 1 <sup>st</sup> block                             | 2 <sup>nd</sup> block | 1 <sup>st</sup> block                             | 2 <sup>nd</sup> block | 1 <sup>st</sup> block                             | 2 <sup>nd</sup> block | 1 <sup>st</sup> block                            | 2 <sup>nd</sup> block |
|                                                   | LC0                                              | GMA                   | LC0                                               | GMA                   | LC0                                               | GMA                   | LC0                                               | GMA                   | LC0                                               | GMA                   | LC0                                              | GMA                   |
| <b>[Monomer]<sub>0</sub> (mmol/mL)</b>            | 2.00                                             | 2.00                  | 2.00                                              | 2.00                  | 2.00                                              | 1.58                  | 2.00                                              | 1.58                  | 2.00                                              | 0.88                  | 2.00                                             | 0.19                  |
| <b>[CTA]<sub>0</sub>/[AIBN]<sub>added</sub></b>   | 10                                               |                       | 10                                                |                       | 10                                                |                       | 10                                                |                       | 10                                                |                       | 10                                               |                       |
| <b>[AIBN]<sub>added</sub> (mg/mL)</b>             | 6.57                                             | 0.66                  | 1.31                                              | 1.31                  | 1.31                                              | 1.31                  | 0.66                                              | 0.66                  | 0.66                                              | 0.66                  | 0.66                                             | 0.66                  |
| <b>[Monomer]<sub>0</sub>/[CTA]<sub>0</sub></b>    | 5                                                | 50                    | 25                                                | 50                    | 25                                                | 25                    | 50                                                | 50                    | 50                                                | 25                    | 50                                               | 5                     |
| <b>[m<sub>CTA</sub>]<sub>added</sub> (mg)</b>     | 153.32                                           |                       | 153.32                                            |                       | 153.32                                            |                       | 76.66                                             |                       | 76.66                                             |                       | 76.66                                            |                       |
| <b>[m<sub>monomer</sub>]<sub>added</sub> (g)</b>  | 0.50                                             | 2.70                  | 2.50                                              | 2.70                  | 2.50                                              | 1.35                  | 2.50                                              | 1.35                  | 2.50                                              | 0.67                  | 2.50                                             | 0.13                  |
| <b>[m<sub>AIBN</sub>]<sub>added</sub> (mg)</b>    | 6.24                                             | 6.24                  | 6.24                                              | 12.47                 | 6.24                                              | 7.89                  | 3.12                                              | 3.94                  | 3.12                                              | 3.53                  | 3.12                                             | 3.20                  |
| <b>[V<sub>dioxane</sub>]<sub>added</sub> (mL)</b> | 0.95                                             | 6.03                  | 4.75                                              | 2.24                  | 4.75                                              | 0                     | 4.75                                              | 0                     | 4.75                                              | 0                     | 4.75                                             | 0                     |
| <b>monomer conversion<sup>[a]</sup></b>           | 98.60%                                           | 96.90%                | 97.80%                                            | 98.20%                | 97.90%                                            | 97.50%                | 98.50%                                            | 98.60%                | 98.90%                                            | 97.60%                | 98.30%                                           | 98.50%                |
| <b>[DP]<sub>th</sub><sup>[b]</sup></b>            | 4.93                                             | 48.45                 | 24.45                                             | 49.10                 | 24.48                                             | 24.38                 | 49.25                                             | 49.30                 | 49.45                                             | 24.40                 | 49.15                                            | 4.93                  |
| <b>M<sub>n,th</sub><sup>[c]</sup> (g/mol)</b>     | 1700                                             | 8600                  | 6800                                              | 13800                 | 6800                                              | 10300                 | 13400                                             | 20400                 | 13400                                             | 16900                 | 13300                                            | 14000                 |
| <b>M<sub>n,SEC</sub><sup>[d]</sup> (g/mol)</b>    | / <sup>[f]</sup>                                 | 8200                  | 7300                                              | 14400                 | 7800                                              | 14100                 | 15900                                             | 19800                 | 13500                                             | 16700                 | 13700                                            | 15400                 |
| <b>M<sub>w,SEC</sub><sup>[d]</sup> (g/mol)</b>    | / <sup>[f]</sup>                                 | 9400                  | 9400                                              | 17700                 | 10200                                             | 16400                 | 18600                                             | 22300                 | 16200                                             | 18100                 | 14800                                            | 19400                 |
| <b>D<sup>[d]</sup></b>                            | / <sup>[f]</sup>                                 | 1.15                  | 1.29                                              | 1.23                  | 1.31                                              | 1.17                  | 1.16                                              | 1.13                  | 1.20                                              | 1.08                  | 1.08                                             | 1.26                  |
| <b>σ<sup>[e]</sup> (g/mol)</b>                    | / <sup>[f]</sup>                                 | 3200                  | 3900                                              | 6900                  | 4300                                              | 5800                  | 6400                                              | 7100                  | 6000                                              | 4700                  | 3800                                             | 7800                  |
| <b>σ/M<sub>n</sub><sup>[e]</sup> (%)</b>          | / <sup>[f]</sup>                                 | 38.7                  | 53.9                                              | 48.0                  | 55.7                                              | 41.2                  | 40.0                                              | 36.1                  | 44.7                                              | 28.3                  | 28.3                                             | 51.0                  |

<sup>[a]</sup>Determined by <sup>1</sup>H NMR. <sup>[b]</sup>[DP]<sub>th</sub> = [Monomer]<sub>0</sub>/[CTA]<sub>0</sub> × monomer conversion. <sup>[c]</sup>M<sub>n,th</sub> = [DP]<sub>th</sub> × M<sub>M</sub> + M<sub>CTA</sub>, M<sub>M</sub> and M<sub>CTA</sub> are the molar mass of monomer and CTA, respectively. <sup>[d]</sup>Determined by SEC using THF as an eluent with polystyrene as molar mass standards. <sup>[e]</sup>σ = M<sub>n</sub> × √(D - 1). <sup>[f]</sup>No valid data obtained due to beyond the limitation.

**Table S2.** Experimental conditions for the synthesis and characterization data of PLC6<sub>m</sub>-*b*-PGMA<sub>n</sub>.

|                                                   | PLC6 <sub>5</sub> - <i>b</i> -PGMA <sub>50</sub> |                       | PLC6 <sub>25</sub> - <i>b</i> -PGMA <sub>50</sub> |                       | PLC6 <sub>25</sub> - <i>b</i> -PGMA <sub>25</sub> |                       | PLC6 <sub>50</sub> - <i>b</i> -PGMA <sub>50</sub> |                       | PLC6 <sub>50</sub> - <i>b</i> -PGMA <sub>25</sub> |                       | PLC6 <sub>50</sub> - <i>b</i> -PGMA <sub>5</sub> |                       |
|---------------------------------------------------|--------------------------------------------------|-----------------------|---------------------------------------------------|-----------------------|---------------------------------------------------|-----------------------|---------------------------------------------------|-----------------------|---------------------------------------------------|-----------------------|--------------------------------------------------|-----------------------|
|                                                   | 1 <sup>st</sup> block                            | 2 <sup>nd</sup> block | 1 <sup>st</sup> block                             | 2 <sup>nd</sup> block | 1 <sup>st</sup> block                             | 2 <sup>nd</sup> block | 1 <sup>st</sup> block                             | 2 <sup>nd</sup> block | 1 <sup>st</sup> block                             | 2 <sup>nd</sup> block | 1 <sup>st</sup> block                            | 2 <sup>nd</sup> block |
|                                                   | LC6                                              | GMA                   | LC6                                               | GMA                   | LC6                                               | GMA                   | LC6                                               | GMA                   | LC6                                               | GMA                   | LC6                                              | GMA                   |
| <b>[Monomer]<sub>0</sub> (mmol/mL)</b>            | 2.00                                             | 2.00                  | 2.00                                              | 2.00                  | 2.00                                              | 1.58                  | 2.00                                              | 1.58                  | 2.00                                              | 0.88                  | 2.00                                             | 0.19                  |
| <b>[CTA]<sub>0</sub>/[AIBN]<sub>added</sub></b>   | 10                                               |                       | 10                                                |                       | 10                                                |                       | 10                                                |                       | 10                                                |                       | 10                                               |                       |
| <b>[AIBN]<sub>added</sub> (mg/mL)</b>             | 6.57                                             | 6.57                  | 1.31                                              | 1.31                  | 1.31                                              | 1.31                  | 0.66                                              | 0.66                  | 0.66                                              | 0.66                  | 0.66                                             | 0.66                  |
| <b>[Monomer]<sub>0</sub>/[CTA]<sub>0</sub></b>    | 5                                                | 50                    | 25                                                | 50                    | 25                                                | 25                    | 50                                                | 50                    | 50                                                | 25                    | 50                                               | 5                     |
| <b>[m<sub>CTA</sub>]<sub>added</sub> (mg)</b>     | 111.08                                           |                       | 111.08                                            |                       | 111.08                                            |                       | 55.54                                             |                       | 55.54                                             |                       | 55.54                                            |                       |
| <b>[m<sub>monomer</sub>]<sub>added</sub> (g)</b>  | 0.50                                             | 1.96                  | 2.50                                              | 1.96                  | 2.50                                              | 0.98                  | 2.50                                              | 0.98                  | 2.50                                              | 0.49                  | 2.50                                             | 0.10                  |
| <b>[m<sub>AIBN</sub>]<sub>added</sub> (mg)</b>    | 4.52                                             | 45.19                 | 4.52                                              | 9.04                  | 4.52                                              | 5.71                  | 2.26                                              | 2.86                  | 2.26                                              | 2.56                  | 2.26                                             | 2.32                  |
| <b>[V<sub>dioxane</sub>]<sub>added</sub> (mL)</b> | 0.69                                             | 4.37                  | 3.44                                              | 1.62                  | 3.44                                              | 0                     | 3.44                                              | 0                     | 3.44                                              | 0                     | 3.44                                             | 0                     |
| <b>monomer conversion<sup>[a]</sup></b>           | 99.10%                                           | 98.60%                | 97.10%                                            | 97.40%                | 98.30%                                            | 97.90%                | 98.10%                                            | 98.60%                | 97.80%                                            | 98.20%                | 99.10%                                           | 98.80%                |
| <b>[DP]<sub>th</sub><sup>[b]</sup></b>            | 4.96                                             | 49.30                 | 24.28                                             | 48.70                 | 24.58                                             | 24.48                 | 49.05                                             | 49.30                 | 48.90                                             | 24.55                 | 49.55                                            | 4.94                  |
| <b>M<sub>n,th</sub><sup>[c]</sup> (g/mol)</b>     | 2200                                             | 9200                  | 9200                                              | 16100                 | 9300                                              | 12800                 | 18200                                             | 25200                 | 18200                                             | 21700                 | 18400                                            | 19100                 |
| <b>M<sub>n,SEC</sub><sup>[d]</sup> (g/mol)</b>    | 3600                                             | 12900                 | 9800                                              | 18600                 | 8400                                              | 11900                 | 17900                                             | 24000                 | 18800                                             | 22600                 | 18600                                            | 19600                 |
| <b>M<sub>w,SEC</sub><sup>[d]</sup> (g/mol)</b>    | 4100                                             | 15200                 | 11600                                             | 20800                 | 9400                                              | 13600                 | 20800                                             | 26300                 | 23500                                             | 28200                 | 20800                                            | 21200                 |
| <b>D<sup>[d]</sup></b>                            | 1.13                                             | 1.18                  | 1.18                                              | 1.12                  | 1.11                                              | 1.15                  | 1.16                                              | 1.10                  | 1.25                                              | 1.25                  | 1.12                                             | 1.08                  |
| <b>σ<sup>[e]</sup> (g/mol)</b>                    | 1300                                             | 5500                  | 4200                                              | 6400                  | 2800                                              | 4600                  | 7200                                              | 7600                  | 9400                                              | 11300                 | 6400                                             | 5500                  |
| <b>σ/M<sub>n</sub><sup>[e]</sup> (%)</b>          | 36.1                                             | 42.4                  | 42.4                                              | 34.6                  | 33.2                                              | 38.7                  | 40.0                                              | 31.6                  | 50.0                                              | 50.0                  | 34.6                                             | 28.3                  |

<sup>[a]</sup>Determined by <sup>1</sup>H NMR. <sup>[b]</sup>[DP]<sub>th</sub> = [Monomer]<sub>0</sub>/[CTA]<sub>0</sub> × monomer conversion. <sup>[c]</sup>M<sub>n,th</sub> = [DP]<sub>th</sub> × M<sub>M</sub> + M<sub>CTA</sub>, M<sub>M</sub> and M<sub>CTA</sub> are the molar mass of monomer and CTA, respectively. <sup>[d]</sup>Determined by SEC using THF as an eluent with polystyrene as molar mass standards. <sup>[e]</sup>σ = M<sub>n</sub> × √D - 1.

**Table S3.** Experimental conditions for the synthesis and characterization data of PLC11<sub>m</sub>-*b*-PGMA<sub>n</sub> and PLC11<sub>50-co</sub>-PGMA<sub>50</sub>.

|                                                   | PLC11 <sub>5</sub> - <i>b</i> - |                          | PLC11 <sub>25</sub> - <i>b</i> - |                          | PLC11 <sub>25</sub> - <i>b</i> - |                          | PLC11 <sub>50</sub> - <i>b</i> - |                          | PLC11 <sub>50-co</sub> - |                          | PLC11 <sub>50</sub> - <i>b</i> - |                          | PLC11 <sub>50</sub> - <i>b</i> - |                          |
|---------------------------------------------------|---------------------------------|--------------------------|----------------------------------|--------------------------|----------------------------------|--------------------------|----------------------------------|--------------------------|--------------------------|--------------------------|----------------------------------|--------------------------|----------------------------------|--------------------------|
|                                                   | PGMA <sub>50</sub>              |                          | PGMA <sub>50</sub>               |                          | PGMA <sub>25</sub>               |                          | PGMA <sub>50</sub>               |                          | PGMA <sub>50</sub>       |                          | PGMA <sub>25</sub>               |                          | PGMA <sub>5</sub>                |                          |
|                                                   | 1 <sup>st</sup><br>block        | 2 <sup>nd</sup><br>block | 1 <sup>st</sup><br>block         | 2 <sup>nd</sup><br>block | 1 <sup>st</sup><br>block         | 2 <sup>nd</sup><br>block | 1 <sup>st</sup><br>block         | 2 <sup>nd</sup><br>block | 1 <sup>st</sup><br>block | 2 <sup>nd</sup><br>block | 1 <sup>st</sup><br>block         | 2 <sup>nd</sup><br>block | 1 <sup>st</sup><br>block         | 2 <sup>nd</sup><br>block |
|                                                   | LC11                            | GMA                      | LC11                             | GMA                      | LC11                             | GMA                      | LC11                             | GMA                      | LC11                     | GMA                      | LC11                             | GMA                      | LC11                             | GMA                      |
| <b>[Monomer]<sub>0</sub> (mmol/mL)</b>            | 2.00                            | 2.00                     | 2.00                             | 2.00                     | 2.00                             | 1.58                     | 2.00                             | 1.58                     | 1.00                     | 1.00                     | 2.00                             | 0.88                     | 2.00                             | 0.19                     |
| <b>[CTA]<sub>0</sub>/[AIBN]<sub>added</sub></b>   | 10                              |                          | 10                               |                          | 10                               |                          | 10                               |                          | 10                       |                          | 10                               |                          | 10                               |                          |
| <b>[AIBN]<sub>added</sub> (mg/mL)</b>             | 6.57                            | 0.66                     | 1.31                             | 1.31                     | 1.31                             | 1.31                     | 0.66                             | 0.66                     | 0.33                     | 0.66                     | 0.66                             | 0.66                     | 0.66                             | 0.66                     |
| <b>[Monomer]<sub>0</sub>/[CTA]<sub>0</sub></b>    | 5                               | 50                       | 25                               | 50                       | 25                               | 25                       | 50                               | 50                       | 50                       | 50                       | 50                               | 25                       | 50                               | 5                        |
| <b>[m<sub>CTA</sub>]<sub>added</sub> (mg)</b>     | 93.11                           |                          | 93.11                            |                          | 93.11                            |                          | 46.56                            |                          | 46.54                    |                          | 46.56                            |                          | 46.56                            |                          |
| <b>[m<sub>monomer</sub>]<sub>added</sub> (g)</b>  | 0.5                             | 1.64                     | 2.50                             | 1.64                     | 2.50                             | 0.82                     | 2.50                             | 0.82                     | 2.50                     | 0.82                     | 2.50                             | 0.41                     | 2.50                             | 0.08                     |
| <b>[m<sub>AIBN</sub>]<sub>added</sub> (mg)</b>    | 3.79                            | 3.79                     | 3.79                             | 7.58                     | 3.79                             | 4.79                     | 1.89                             | 2.39                     | 1.89                     | 1.89                     | 1.89                             | 2.14                     | 1.89                             | 1.94                     |
| <b>[V<sub>dioxane</sub>]<sub>added</sub> (mL)</b> | 0.58                            | 3.66                     | 2.88                             | 1.36                     | 2.88                             | 0                        | 2.88                             | 0                        | 5.7                      | 2.88                     | 0                                | 2.88                     | 0                                | 0                        |
| <b>monomer conversion<sup>[a]</sup></b>           | 98.3%                           | 98.8%                    | 99.1%                            | 98.6%                    | 97.4%                            | 98.5%                    | 98.5%                            | 99.1%                    | 97.6%                    | 98.5%                    | 98.7%                            | 98.3%                    | 97.9%                            | 96.4%                    |
| <b>[DP]<sub>th</sub><sup>[b]</sup></b>            | 4.92                            | 49.40                    | 24.78                            | 49.30                    | 24.35                            | 24.63                    | 49.25                            | 49.55                    | 48.80                    | 49.25                    | 49.35                            | 24.58                    | 48.95                            | 4.82                     |
| <b>M<sub>n,th</sub><sup>[c]</sup> (g/mol)</b>     | 2500                            | 9600                     | 11100                            | 18200                    | 11000                            | 14500                    | 21800                            | 28800                    | 28600                    | 28600                    | 21800                            | 25300                    | 21600                            | 22300                    |
| <b>M<sub>n,SEC</sub><sup>[d]</sup> (g/mol)</b>    | 4500                            | 9900                     | 12300                            | 19400                    | 11300                            | 15000                    | 21100                            | 29600                    | 28000                    | 28000                    | 19900                            | 24000                    | 19600                            | 21400                    |
| <b>M<sub>w,SEC</sub><sup>[d]</sup> (g/mol)</b>    | 5300                            | 13800                    | 15000                            | 25500                    | 12800                            | 16500                    | 26100                            | 36100                    | 33300                    | 33300                    | 24900                            | 26900                    | 21200                            | 25500                    |
| <b>D<sup>[d]</sup></b>                            | 1.17                            | 1.40                     | 1.22                             | 1.32                     | 1.14                             | 1.10                     | 1.23                             | 1.22                     | 1.19                     | 1.19                     | 1.25                             | 1.12                     | 1.08                             | 1.19                     |
| <b>σ<sup>[e]</sup> (g/mol)</b>                    | 1900                            | 6300                     | 5800                             | 11000                    | 4200                             | 4700                     | 10100                            | 13900                    | 12200                    | 12200                    | 10000                            | 8300                     | 5500                             | 9300                     |
| <b>σ/M<sub>n</sub><sup>[e]</sup> (%)</b>          | 41.2                            | 63.2                     | 46.9                             | 56.6                     | 37.4                             | 31.6                     | 48.0                             | 46.9                     | 43.6                     | 43.6                     | 50.0                             | 34.6                     | 28.3                             | 43.6                     |

<sup>[a]</sup>Determined by <sup>1</sup>H NMR. <sup>[b]</sup>[DP]<sub>th</sub> = [Monomer]<sub>0</sub>/[CTA]<sub>0</sub> × monomer conversion. <sup>[c]</sup>M<sub>n,th</sub> = [DP]<sub>th</sub> × M<sub>M</sub> + M<sub>CTA</sub>, M<sub>M</sub> and M<sub>CTA</sub> are the molar mass of monomer and CTA, respectively. <sup>[d]</sup>Determined by SEC using THF as an eluent with polystyrene as molar mass standards. <sup>[e]</sup>σ = M<sub>n</sub> × √(D - 1).

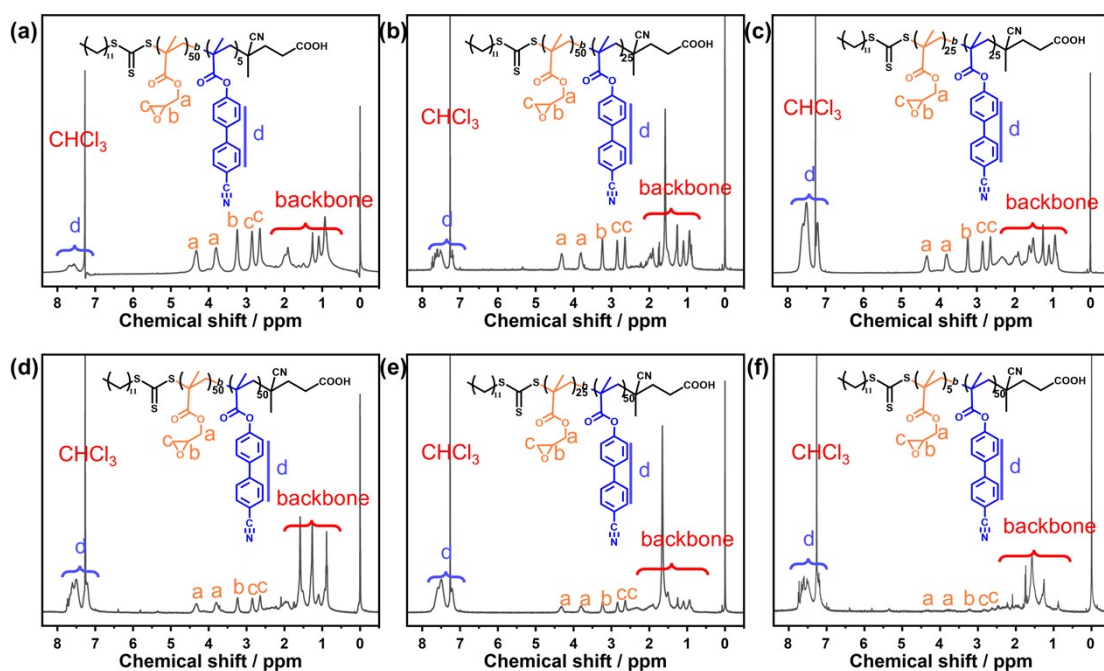

**Fig. S1.**  $^1\text{H}$  NMR spectra of (a) PLC0<sub>5</sub>-*b*-PGMA<sub>50</sub>, (b) PLC0<sub>25</sub>-*b*-PGMA<sub>50</sub>, (c) PLC0<sub>25</sub>-*b*-PGMA<sub>25</sub>, (d) PLC0<sub>50</sub>-*b*-PGMA<sub>50</sub>, (e) PLC0<sub>50</sub>-*b*-PGMA<sub>25</sub>, and (f) PLC0<sub>50</sub>-*b*-PGMA<sub>5</sub>.

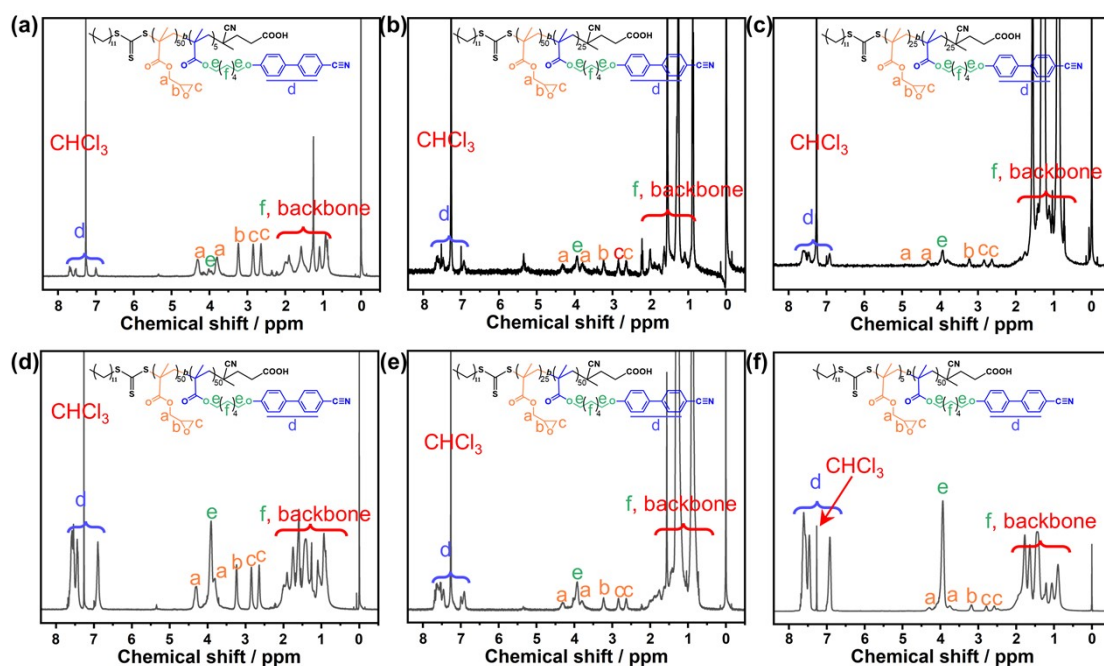

**Fig. S2.**  $^1\text{H}$  NMR spectra of (a) PLC6<sub>5</sub>-*b*-PGMA<sub>50</sub>, (b) PLC6<sub>25</sub>-*b*-PGMA<sub>50</sub>, (c) PLC6<sub>25</sub>-*b*-PGMA<sub>25</sub>, (d) PLC6<sub>50</sub>-*b*-PGMA<sub>50</sub>, (e) PLC6<sub>50</sub>-*b*-PGMA<sub>25</sub>, and (f) PLC6<sub>50</sub>-*b*-PGMA<sub>5</sub>.

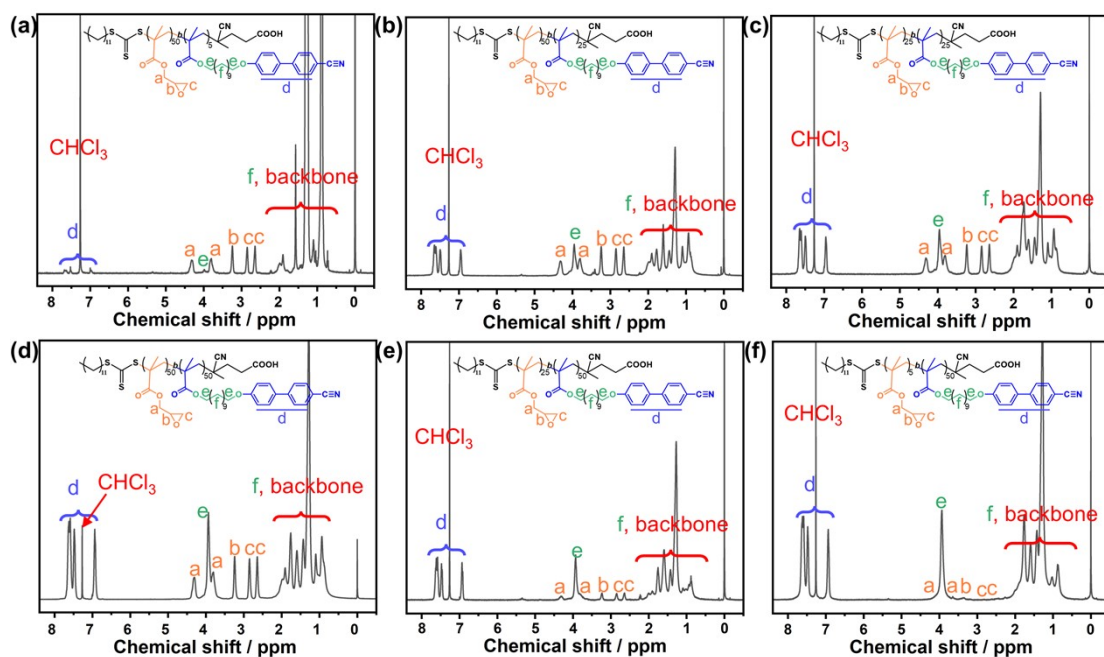

**Fig. S3.**  $^1\text{H}$  NMR spectra of (a) PLC11<sub>5</sub>-*b*-PGMA<sub>50</sub>, (b) PLC11<sub>25</sub>-*b*-PGMA<sub>50</sub>, (c) PLC11<sub>25</sub>-*b*-PGMA<sub>25</sub>, (d) PLC11<sub>50</sub>-*b*-PGMA<sub>50</sub>, (e) PLC11<sub>50</sub>-*b*-PGMA<sub>25</sub>, and (f) PLC11<sub>50</sub>-*b*-PGMA<sub>5</sub>.

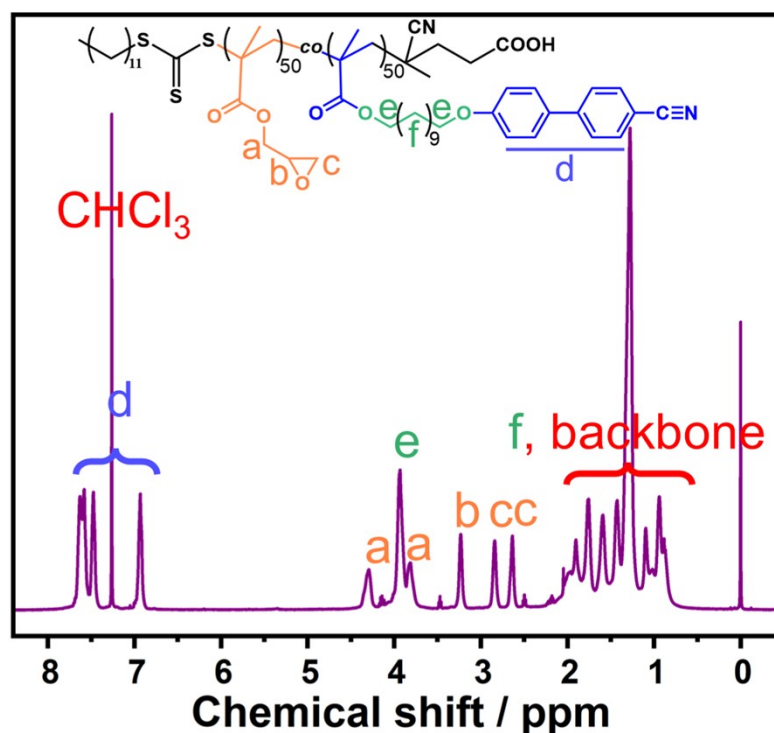

**Fig. S4.**  $^1\text{H}$  NMR spectra of PLC11<sub>50</sub>-*co*-PGMA<sub>50</sub>.

$^1\text{H}$  NMR analysis of PLC<sub>*x*</sub><sub>*m*</sub>-*b*-PGMA<sub>*n*</sub> and PLC<sub>*x*</sub><sub>*50*</sub>-*co*-PGMA<sub>50</sub> (**Fig. 1h** and **Fig. S1-4**, 400 MHz, CDCl<sub>3</sub>, exemplified by PLC11<sub>50</sub>-*b*-PGMA<sub>50</sub>): The peaks at 7.58, 7.47, and 6.92 ppm were assigned to protons in the benzene rings of

LC11. The peaks at 4.29, 3.82, 3.24, 2.85, and 2.64 ppm were attributed to protons of epoxy groups. The peaks at 3.94 and 1.93-0.93 ppm were ascribed to protons of the flexible chain segment  $(-\text{CH}_2-)_{11}$  and main chain of the polymer.  $^{13}\text{C}$  NMR analysis of  $\text{PLCx}_m\text{-}b\text{-PGMA}_n$  and  $\text{PLCx}_{50}\text{-co-PGMA}_{50}$  (**Fig. 1i**, 100 MHz,  $\text{CDCl}_3$ , exemplified by  $\text{PLC11}_{50}\text{-}b\text{-PGMA}_{50}$ ): The peak at 159.7 ppm was attributed to the carbonyl groups in GMA and LC11. The peaks at 145.1-110.1 ppm were corresponded to the carbon atoms in the benzene rings of the biphenyl structure in LC11. The peaks at 68.1, 49.0, and 44.7 ppm were assigned to the three carbon atoms of the epoxy group in GMA. The peak at 65.9 ppm belonged to the carbon atom of the flexible chain segment  $(-\text{CH}_2-)_{11}$ . The peaks at 29.7 to 16.6 ppm belonged to the carbon atoms of the polymer main chain.

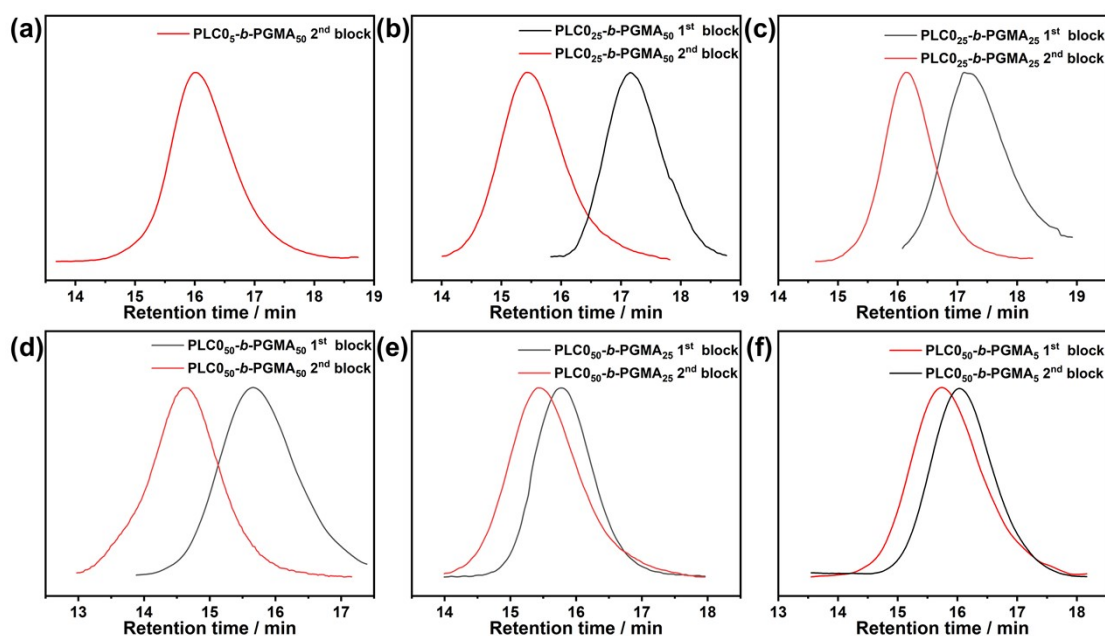

**Fig. S5.** SEC curves of (a)  $\text{PLC0}_5\text{-}b\text{-PGMA}_{50}$  (No valid data for the block obtained due to beyond the limitation), (b)  $\text{PLC0}_{25}\text{-}b\text{-PGMA}_{50}$ , (c)  $\text{PLC0}_{25}\text{-}b\text{-PGMA}_{25}$ , (d)  $\text{PLC0}_{50}\text{-}b\text{-PGMA}_{50}$ , (e)  $\text{PLC0}_{50}\text{-}b\text{-PGMA}_{25}$ , and (f)  $\text{PLC0}_{50}\text{-}b\text{-PGMA}_5$ .

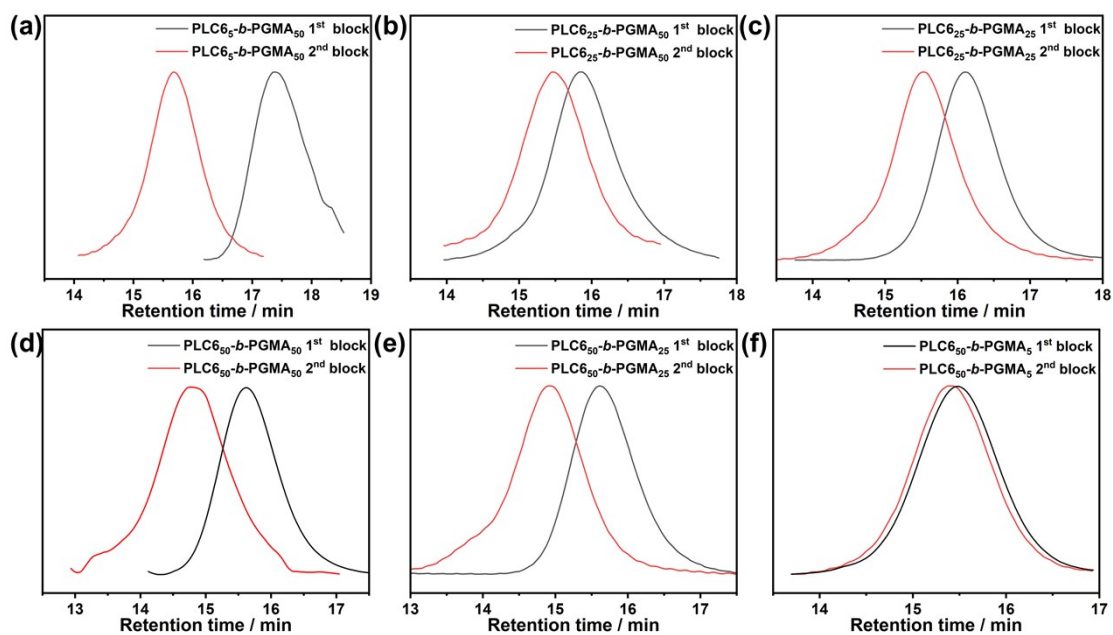

**Fig. S6.** SEC curves of (a) PLC6<sub>5</sub>-*b*-PGMA<sub>50</sub>, (b) PLC6<sub>25</sub>-*b*-PGMA<sub>50</sub>, (c) PLC6<sub>25</sub>-*b*-PGMA<sub>25</sub>, (d) PLC6<sub>50</sub>-*b*-PGMA<sub>50</sub>, (e) PLC6<sub>50</sub>-*b*-PGMA<sub>25</sub>, and (f) PLC6<sub>50</sub>-*b*-PGMA<sub>5</sub>.

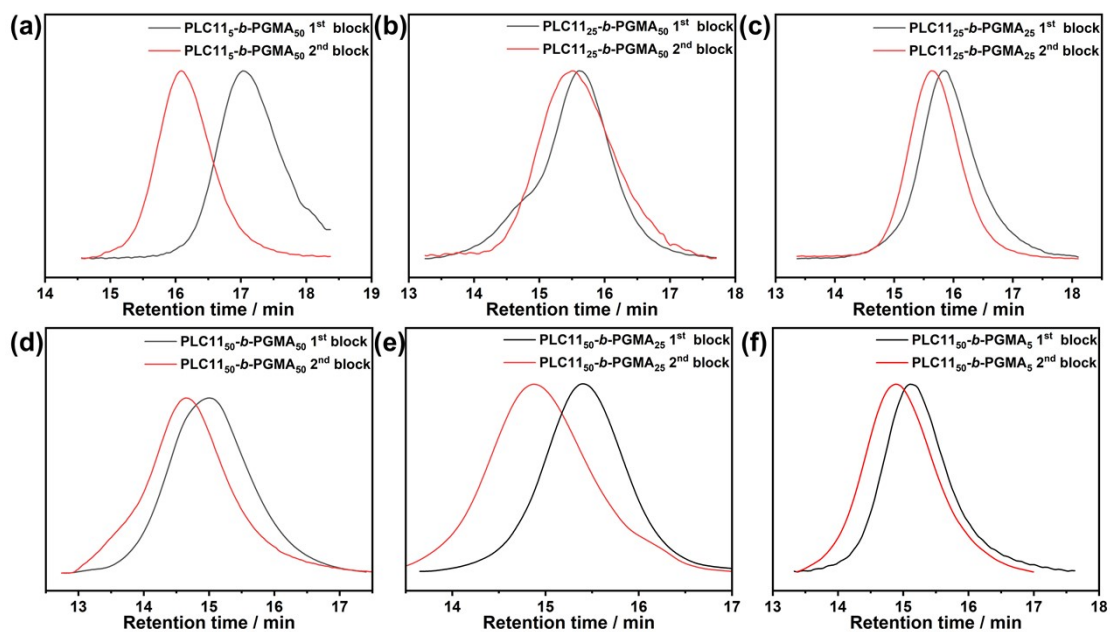

**Fig. S7.** SEC curves of (a) PLC11<sub>5</sub>-*b*-PGMA<sub>50</sub>, (b) PLC11<sub>25</sub>-*b*-PGMA<sub>50</sub>, (c) PLC11<sub>25</sub>-*b*-PGMA<sub>25</sub>, (d) PLC11<sub>50</sub>-*b*-PGMA<sub>50</sub>, (e) PLC11<sub>50</sub>-*b*-PGMA<sub>25</sub>, and (f) PLC11<sub>50</sub>-*b*-PGMA<sub>5</sub>.

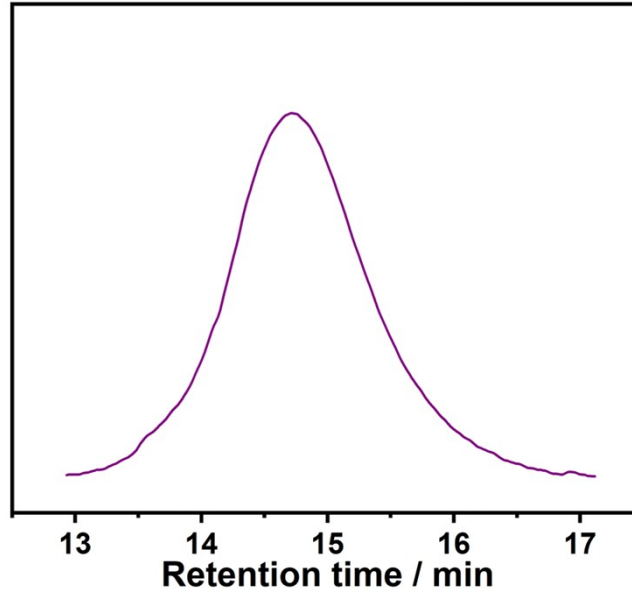

**Fig. S8.** SEC curve of PLCX<sub>50</sub>-co-PGMA<sub>50</sub> (exemplified by PLC11<sub>50</sub>-co-PGMA<sub>50</sub>).

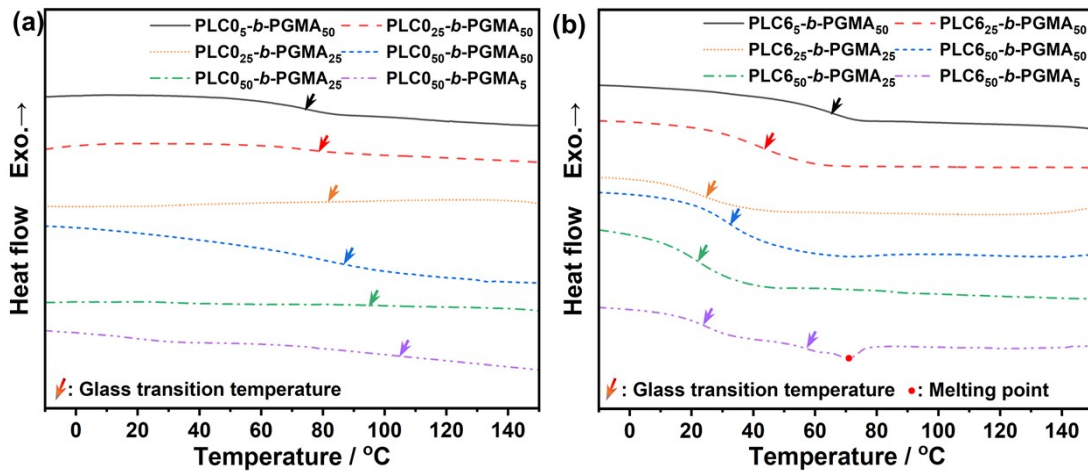

**Fig. S9.** DSC curves of (a) PLC0<sub>m</sub>-b-PGMA<sub>n</sub> and (b) PLC6<sub>m</sub>-b-PGMA<sub>n</sub>.

### Flory-Fox equation

$$T_g = T_g^{(\infty)} - \frac{K}{M_n} \quad (\text{Eq. S1})$$

where  $T_g^{(\infty)}$  is the glass transition temperature of the polymer when the molecular weight is infinite,  $K$  is the characteristic constant for each polymer, and  $M_n$  is the number average molecular weight.

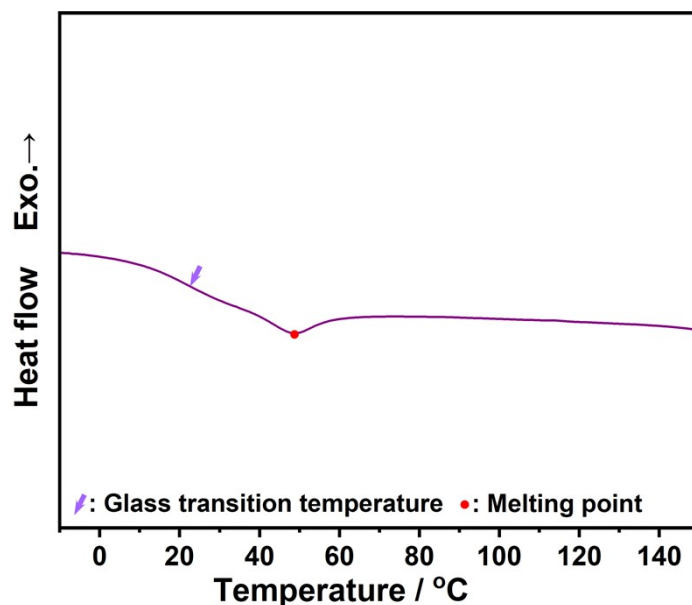

Fig. S10. DSC curve of PLC11<sub>50</sub>-co-PGMA<sub>50</sub>.

Table S4. DSC data of PLC<sub>x<sub>m</sub></sub>-*b*-PGMA<sub>n</sub> and PLC11<sub>50</sub>-co-PGMA<sub>50</sub>.

| Sample                                             | $T_g / ^\circ\text{C}$ |          | $T_m / ^\circ\text{C}$ | $\Delta H_m^a / \text{J}\cdot\text{g}^{-1}$ |
|----------------------------------------------------|------------------------|----------|------------------------|---------------------------------------------|
|                                                    | $T_{g1}$               | $T_{g2}$ |                        |                                             |
| PLC0 <sub>5</sub> - <i>b</i> -PGMA <sub>50</sub>   | 74.3                   | /        | /                      | /                                           |
| PLC0 <sub>25</sub> - <i>b</i> -PGMA <sub>50</sub>  | 78.5                   | /        | /                      | /                                           |
| PLC0 <sub>25</sub> - <i>b</i> -PGMA <sub>25</sub>  | 81.7                   | /        | /                      | /                                           |
| PLC0 <sub>50</sub> - <i>b</i> -PGMA <sub>50</sub>  | 86.4                   | /        | /                      | /                                           |
| PLC0 <sub>50</sub> - <i>b</i> -PGMA <sub>25</sub>  | 94.6                   | /        | /                      | /                                           |
| PLC0 <sub>50</sub> - <i>b</i> -PGMA <sub>5</sub>   | 104.5                  | /        | /                      | /                                           |
| PLC6 <sub>5</sub> - <i>b</i> -PGMA <sub>50</sub>   | 65.8                   | /        | /                      | /                                           |
| PLC6 <sub>25</sub> - <i>b</i> -PGMA <sub>50</sub>  | 43.4                   | /        | /                      | /                                           |
| PLC6 <sub>25</sub> - <i>b</i> -PGMA <sub>25</sub>  | 24.4                   | /        | /                      | /                                           |
| PLC6 <sub>50</sub> - <i>b</i> -PGMA <sub>50</sub>  | 31.5                   | /        | /                      | /                                           |
| PLC6 <sub>50</sub> - <i>b</i> -PGMA <sub>25</sub>  | 21.7                   | /        | /                      | /                                           |
| PLC6 <sub>50</sub> - <i>b</i> -PGMA <sub>5</sub>   | 23.7                   | 57.2     | 71.0                   | 0.77                                        |
| PLC11 <sub>5</sub> - <i>b</i> -PGMA <sub>50</sub>  | 60.7                   | /        | /                      | /                                           |
| PLC11 <sub>25</sub> - <i>b</i> -PGMA <sub>50</sub> | 15.6                   | 33.3     | 77.8                   | 1.62                                        |
| PLC11 <sub>25</sub> - <i>b</i> -PGMA <sub>25</sub> | 13.1                   | 30.4     | 67.6                   | 2.20                                        |
| PLC11 <sub>50</sub> - <i>b</i> -PGMA <sub>50</sub> | 15.9                   | 36.4     | 96.5                   | 3.01                                        |
| PLC11 <sub>50</sub> -co-PGMA <sub>50</sub>         | 22.3                   | /        | 48.4                   | 2.56                                        |
| PLC11 <sub>50</sub> - <i>b</i> -PGMA <sub>25</sub> | 8.4                    | 30.1     | 79.7                   | 5.05                                        |
| PLC11 <sub>50</sub> - <i>b</i> -PGMA <sub>5</sub>  | 7.6                    | 29.5     | 84.6                   | 8.91                                        |

<sup>a</sup>Obtained from DSC,  $\Delta H = \frac{\int_{T_2}^{T_1} (\frac{dQ}{dt}) dt}{m}$ , where  $T_1$  and  $T_2$  are the start and end temperatures of the characteristic peak,  $\frac{dQ}{dt}$  is the heat flow, and  $m$  is the sample mass. Calculate  $\Delta H_f$ ,  $\Delta H_c$ ,  $\Delta H_{cp}$  using this method.

**Curing of PLC<sub>x<sub>m</sub></sub>-*b*-PGMA<sub>n</sub>:** To achieve an ordered microstructure, a pre-curing and post-curing process was employed. Specifically, the polymer was pre-cured for 2 hours at the beginning temperature of the curing exothermic peak and post-cured for 2 hours at the peak temperature of the curing exothermic peak (**Fig. S11**). DSC curves of B-ER<sub>x<sub>m</sub></sub>-<sub>n</sub> and R-ER<sub>11<sub>m</sub></sub>-<sub>n</sub> showed no exothermic peaks indicative of curing reactions (**Fig. S12-13**). In FT-IR spectra (**Fig. S14-15**), the characteristic peaks of the epoxy groups at 913 cm<sup>-1</sup> in B-ER<sub>x<sub>m</sub></sub>-<sub>n</sub> and R-ER<sub>x<sub>m</sub></sub>-<sub>n</sub> have completely disappeared while a secondary hydroxyl peak at 3374 cm<sup>-1</sup> appeared, which was generated by epoxy ring-opening, confirming the epoxy groups have completely cured. Notably, R-ER<sub>11<sub>50</sub></sub>-<sub>50</sub> formed by curing the random copolymer PLC<sub>11<sub>50</sub></sub>-*co*-PGMA<sub>50</sub> (melting point temperature ( $T_m$ ) = 48.4°C,  $\Delta H_m$  = 2.56 J/g) no longer exhibited a crystalline melting peak (**Fig. S13**), while B-ER<sub>11<sub>50</sub></sub>-<sub>50</sub> cured by PLC<sub>11<sub>50</sub></sub>-*b*-PGMA<sub>50</sub> ( $T_m$  = 96.5°C,  $\Delta H_m$  = 3.01 J/g) still exhibited distinct crystalline melting peaks ( $T_m$  = 104.6°C,  $\Delta H_m$  = 2.84 J/g), indicating that the block copolymer effectively retained the crystalline structure of the polymer during curing.

The detailed curing processes of the polymers were as following: 70°C/2 hours + 125°C/2 hours for PLC<sub>0<sub>5</sub></sub>-*b*-PGMA<sub>50</sub>; 80°C/2 hours + 160°C/2 hours for

PLC0<sub>25</sub>-*b*-PGMA<sub>50</sub>; 75°C/2 hours + 160°C/2 hours for PLC0<sub>25</sub>-*b*-PGMA<sub>25</sub>; 80°C/2 hours + 155°C/2 hours for PLC0<sub>50</sub>-*b*-PGMA<sub>50</sub>; 95°C/2 hours + 150°C/2 hours for PLC0<sub>50</sub>-*b*-PGMA<sub>25</sub>; 125°C/2 hours + 160°C/2 hours for PLC0<sub>50</sub>-*b*-PGMA<sub>5</sub>; 70°C/2 hours + 140°C/2 hours for PLC6<sub>5</sub>-*b*-PGMA<sub>50</sub>; 70°C/2 hours + 145°C/2 hours for PLC6<sub>25</sub>-*b*-PGMA<sub>50</sub>; 100°C/2 hours + 170°C/2 hours for PLC6<sub>25</sub>-*b*-PGMA<sub>25</sub>; 90°C/2 hours + 170°C/2 hours for PLC6<sub>50</sub>-*b*-PGMA<sub>50</sub>; 95°C/2 hours + 135°C/2 hours for PLC6<sub>50</sub>-*b*-PGMA<sub>25</sub>; 100°C/2 hours + 175°C/2 hours for PLC6<sub>50</sub>-*b*-PGMA<sub>5</sub>; 60°C/2 hours + 125°C/2 hours for PLC11<sub>5</sub>-*b*-PGMA<sub>50</sub>; 80°C/2 hours + 145°C/2 hours for PLC11<sub>25</sub>-*b*-PGMA<sub>50</sub>; 100°C/2 hours + 175°C/2 hours for PLC11<sub>25</sub>-*b*-PGMA<sub>25</sub>; was as following: 95°C/2 hours + 170°C/2 hours for PLC11<sub>50</sub>-*b*-PGMA<sub>50</sub>; 70°C/2 hours + 170°C/2 hours for PLC11<sub>50</sub>-*co*-PGMA<sub>50</sub>; 110°C/2 hours + 180°C/2 hours for PLC11<sub>50</sub>-*b*-PGMA<sub>25</sub>; 110°C/2 hours + 170°C/2 hours for PLC11<sub>50</sub>-*b*-PGMA<sub>5</sub>.

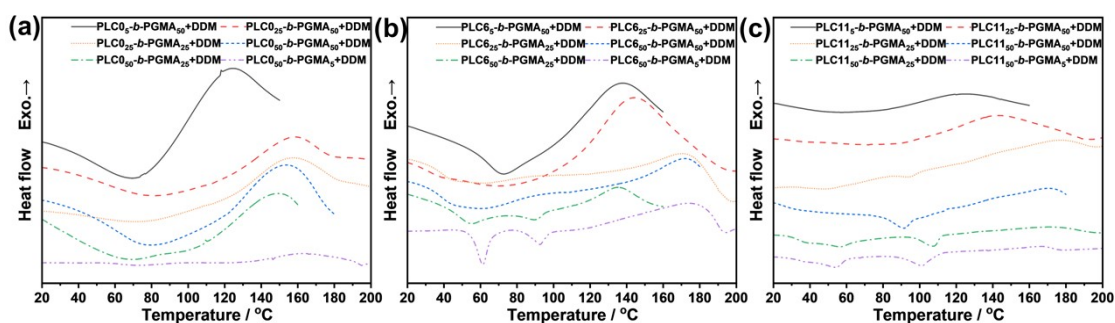

**Fig. S11.** DSC curves of the curing process of (a) PLC0<sub>m</sub>-*b*-PGMA<sub>n</sub>, (b) PLC6<sub>m</sub>-*b*-PGMA<sub>n</sub>, and (c) PLC11<sub>m</sub>-*b*-PGMA<sub>n</sub> with DDM.

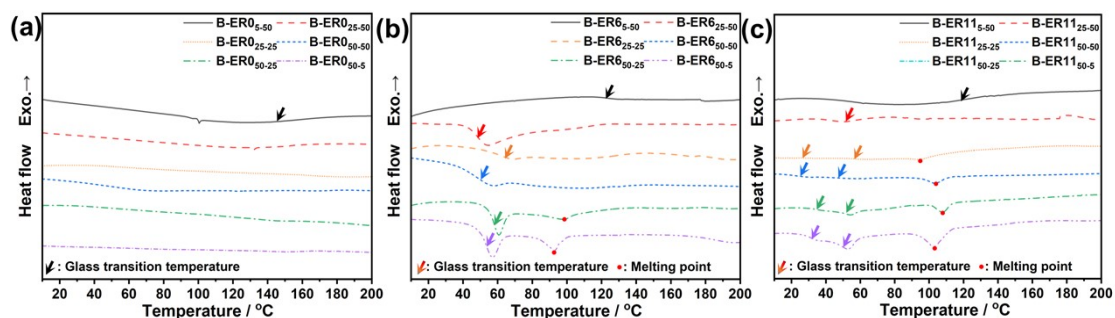

**Fig. S12.** DSC curves of (a) B-ER0<sub>m-n</sub>, (b) B-ER6<sub>m-n</sub>, and (c) B-ER11<sub>m-n</sub>.

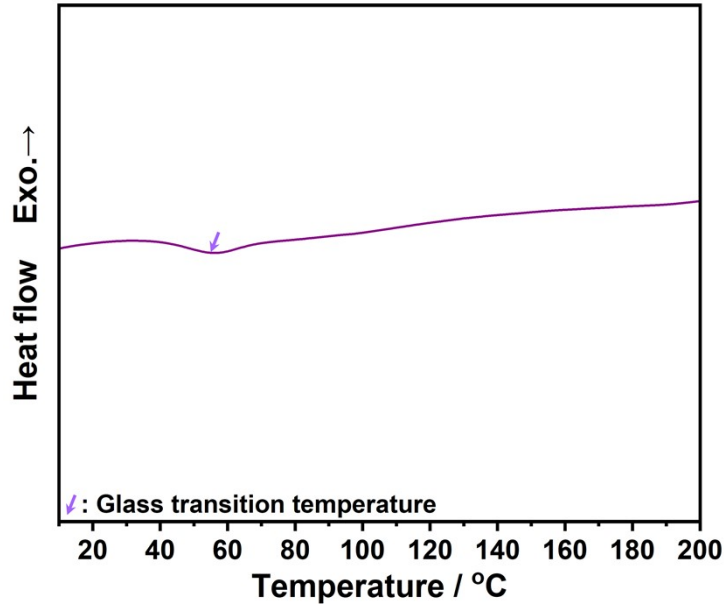

**Fig. S13.** DSC curve of R-ER11<sub>50-50</sub>.

**Table S5.** DSC data of B-ERx<sub>m-n</sub> and R-ER11<sub>50-50</sub>.

| Sample                  | $T_g / ^\circ\text{C}$ |          | $T_m / ^\circ\text{C}$ | $\Delta H_m^a / \text{J}\cdot\text{g}^{-1}$ |
|-------------------------|------------------------|----------|------------------------|---------------------------------------------|
|                         | $T_{g1}$               | $T_{g2}$ |                        |                                             |
| B-ER0 <sub>5-50</sub>   | 145.2                  | /        | /                      | /                                           |
| B-ER0 <sub>25-50</sub>  | /                      | /        | /                      | /                                           |
| B-ER0 <sub>25-25</sub>  | /                      | /        | /                      | /                                           |
| B-ER0 <sub>50-50</sub>  | /                      | /        | /                      | /                                           |
| B-ER0 <sub>50-25</sub>  | /                      | /        | /                      | /                                           |
| B-ER0 <sub>50-5</sub>   | /                      | /        | /                      | /                                           |
| -----                   |                        |          |                        |                                             |
| B-ER6 <sub>5-50</sub>   | 122.3                  | /        | /                      | /                                           |
| B-ER6 <sub>25-50</sub>  | 48.7                   | /        | /                      | /                                           |
| B-ER6 <sub>25-25</sub>  | 64.8                   | /        | /                      | /                                           |
| B-ER6 <sub>50-50</sub>  | 50.3                   | /        | /                      | /                                           |
| B-ER6 <sub>50-25</sub>  | 58.2                   | /        | 98.6                   | 1.63                                        |
| B-ER6 <sub>50-5</sub>   | 53.5                   | /        | 92.7                   | 2.99                                        |
| -----                   |                        |          |                        |                                             |
| B-ER11 <sub>5-50</sub>  | 118.5                  | /        | /                      | /                                           |
| B-ER11 <sub>25-50</sub> | 52.0                   | /        | /                      | /                                           |
| B-ER11 <sub>25-25</sub> | 26.6                   | 56.8     | 94.4                   | 0.37                                        |
| B-ER11 <sub>50-50</sub> | 25.8                   | 47.7     | 104.6                  | 2.84                                        |
| R-ER11 <sub>50-50</sub> | 55.4                   | /        | /                      | /                                           |
| B-ER11 <sub>50-25</sub> | 34.6                   | 51.7     | 108.4                  | 3.10                                        |

$$\Delta H = \frac{\int_{T_2}^{T_1} \left(\frac{dQ}{dt}\right) dt}{m}$$
<sup>a</sup>Obtained from DSC, where  $T_1$  and  $T_2$  are the start and end temperatures of the

characteristic peak,  $\frac{dQ}{dt}$  is the heat flow, and  $m$  is the sample mass. Calculate  $\Delta H_f$ ,  $\Delta H_c$ ,  $\Delta H_{cp}$  using this method.

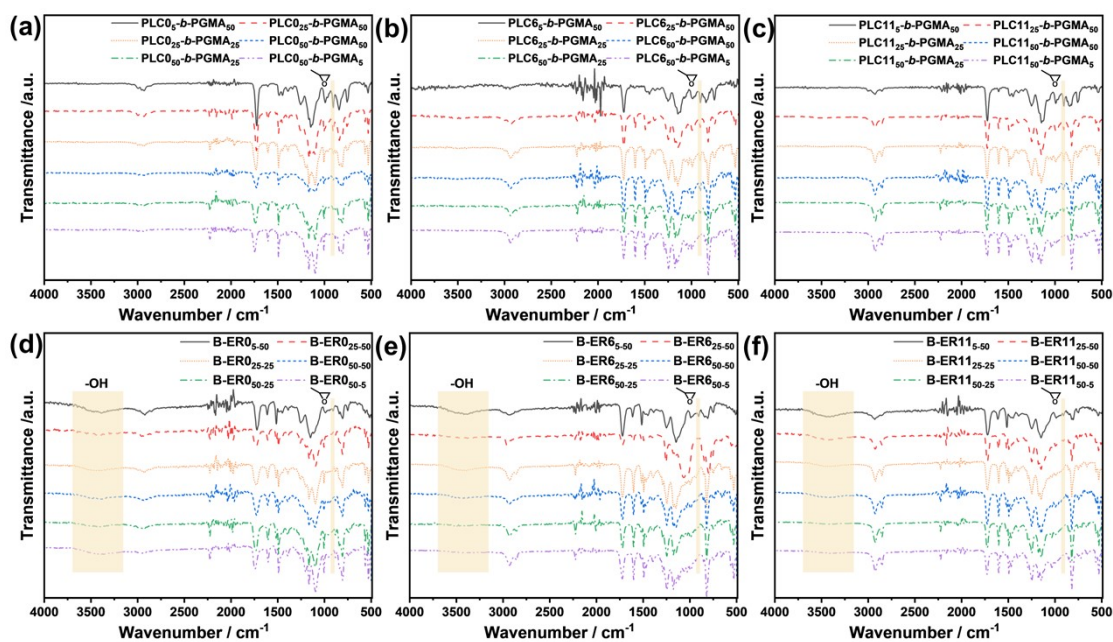

**Fig. S14.** FT-IR spectra of (a) PLC0<sub>m</sub>-*b*-PGMA<sub>n</sub>, (b) PLC6<sub>m</sub>-*b*-PGMA<sub>n</sub>, (c) PLC11<sub>m</sub>-*b*-PGMA<sub>n</sub>, (d) B-ER0<sub>m-n</sub>, (e) B-ER6<sub>m-n</sub>, and (f) B-ER11<sub>m-n</sub>.

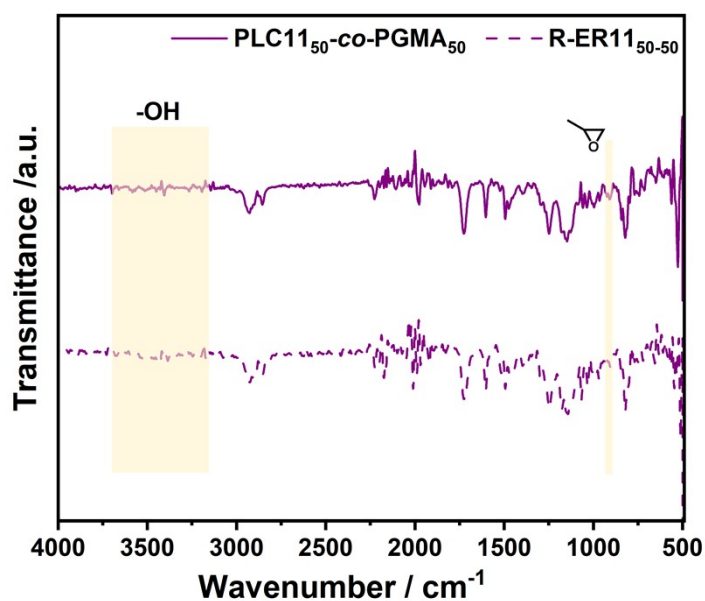

**Fig. S15.** FT-IR spectra of PLC11<sub>50</sub>-*co*-PGMA<sub>50</sub> and R-ER11<sub>50-50</sub>.

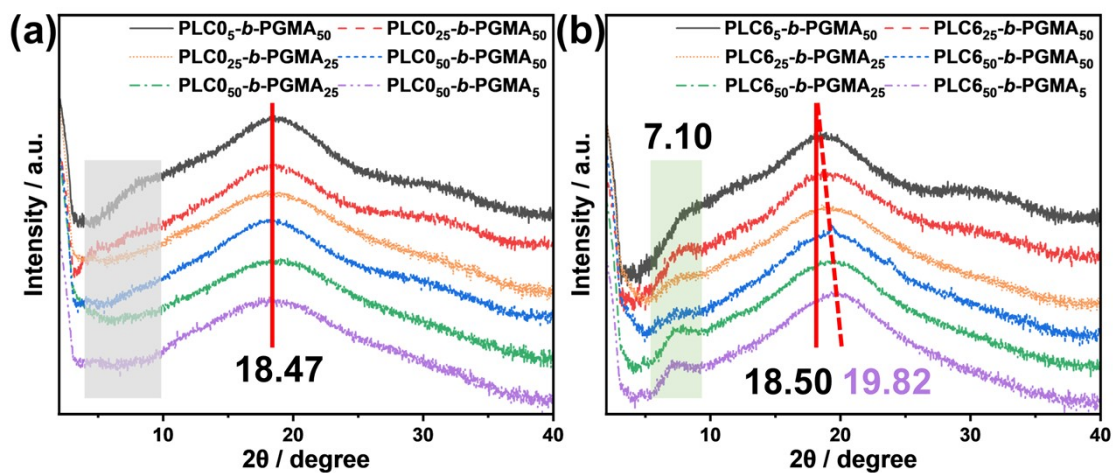

Fig. S16. WAXD curves of (a)  $\text{PLC0}_m\text{-}b\text{-PGMA}_n$  and (b)  $\text{PLC6}_m\text{-}b\text{-PGMA}_n$ .

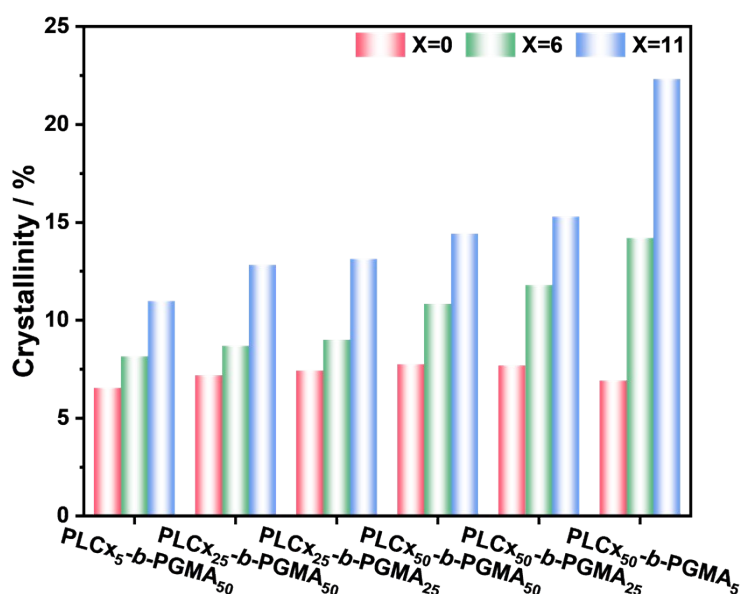

Fig. S17. Crystallinity of  $\text{PLC}x_m\text{-}b\text{-PGMA}_n$ .

Table S6. Crystalline grain structure and  $\lambda$  values for  $\text{PLC}x_m\text{-}b\text{-PGMA}_n$ ,  $\text{PLC11}_{50}\text{-}co\text{-PGMA}_{50}$ , and  $\text{PLC11}_{50}$

| Samples                                      | $d_1^{[a]}$ / Å | $d_2^{[a]}$ / Å | $\lambda$ / W/(m·K) |
|----------------------------------------------|-----------------|-----------------|---------------------|
| $\text{PLC0}_5\text{-}b\text{-PGMA}_{50}$    | 4.80            | /               | $0.20 \pm 0.0031$   |
| $\text{PLC0}_{25}\text{-}b\text{-PGMA}_{50}$ | 4.80            | /               | $0.19 \pm 0.0043$   |
| $\text{PLC0}_{25}\text{-}b\text{-PGMA}_{25}$ | 4.80            | /               | $0.20 \pm 0.0044$   |
| $\text{PLC0}_{50}\text{-}b\text{-PGMA}_{50}$ | 4.80            | /               | $0.21 \pm 0.0036$   |
| $\text{PLC0}_{50}\text{-}b\text{-PGMA}_{25}$ | 4.80            | /               | $0.21 \pm 0.0041$   |
| $\text{PLC0}_{50}\text{-}b\text{-PGMA}_5$    | 4.80            | /               | $0.22 \pm 0.0036$   |
| $\text{PLC6}_5\text{-}b\text{-PGMA}_{50}$    | 4.79            | 11.37           | $0.24 \pm 0.0046$   |
| $\text{PLC6}_{25}\text{-}b\text{-PGMA}_{50}$ | 4.68            | 12.44           | $0.22 \pm 0.0032$   |

**Table S6.** Crystalline grain structure and  $\lambda$  values for PLC $x_m$ -*b*-PGMA $_n$ , PLC11 $_{50}$ -co-PGMA $_{50}$ , and PLC11 $_{50}$  (Continued).

| Samples                                | $d_1^{[a]}$ / Å | $d_2^{[a]}$ / Å | $\lambda$ / W/(m·K) |
|----------------------------------------|-----------------|-----------------|---------------------|
| PLC6 $_{25}$ - <i>b</i> -PGMA $_{25}$  | 4.61            | 12.44           | 0.23 ± 0.0051       |
| PLC6 $_{50}$ - <i>b</i> -PGMA $_{50}$  | 4.57            | 12.44           | 0.23 ± 0.0036       |
| PLC6 $_{50}$ - <i>b</i> -PGMA $_{25}$  | 4.53            | 12.44           | 0.24 ± 0.0028       |
| PLC6 $_{50}$ - <i>b</i> -PGMA $_5$     | 4.47            | 12.44           | 0.26 ± 0.0042       |
| -----                                  |                 |                 |                     |
| PLC11 $_5$ - <i>b</i> -PGMA $_{50}$    | 4.77            | 11.45           | 0.25 ± 0.0039       |
| PLC11 $_{25}$ - <i>b</i> -PGMA $_{50}$ | 4.53            | 17.14           | 0.23 ± 0.0044       |
| PLC11 $_{25}$ - <i>b</i> -PGMA $_{25}$ | 4.49            | 17.14           | 0.27 ± 0.0031       |
| PLC11 $_{50}$ - <i>b</i> -PGMA $_{50}$ | 4.43            | 17.14           | 0.27 ± 0.0042       |
| PLC11 $_{50}$ - <i>b</i> -PGMA $_{25}$ | 4.42            | 17.14           | 0.25 ± 0.0051       |
| PLC11 $_{50}$ -co-PGMA $_{50}$         | 4.49            | 17.14           | 0.22 ± 0.0038       |
| PLC11 $_{50}$ - <i>b</i> -PGMA $_5$    | 4.40            | 17.14           | 0.29 ± 0.0031       |
| PLC11 $_{50}$                          | 4.38            | 15.94           | 0.33 ± 0.0034       |

<sup>[a]</sup>Determined based on the WAXD results.

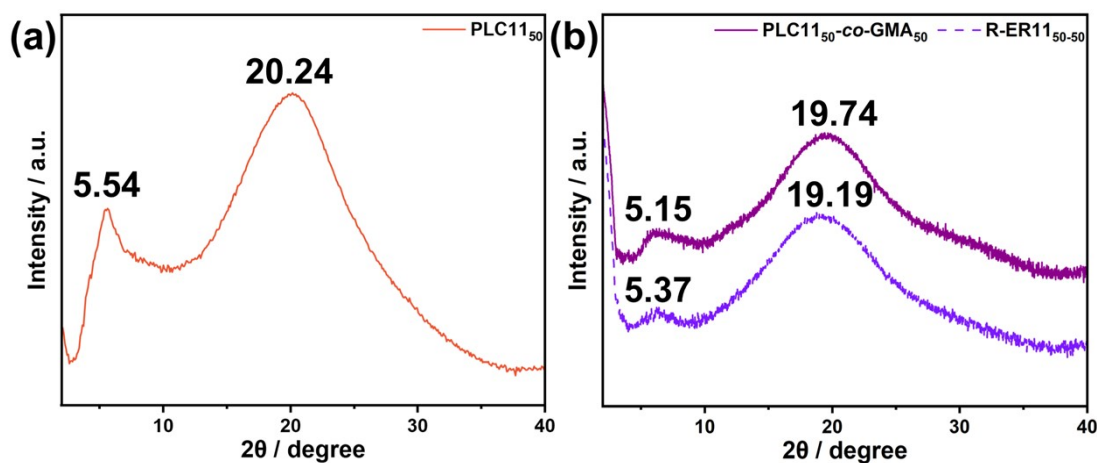

**Fig. S18.** WAXD curves of (a) PLC11 $_{50}$  and (b) PLC11 $_{50}$ -co-PGMA $_{50}$  and R-ER11 $_{50-50}$ .

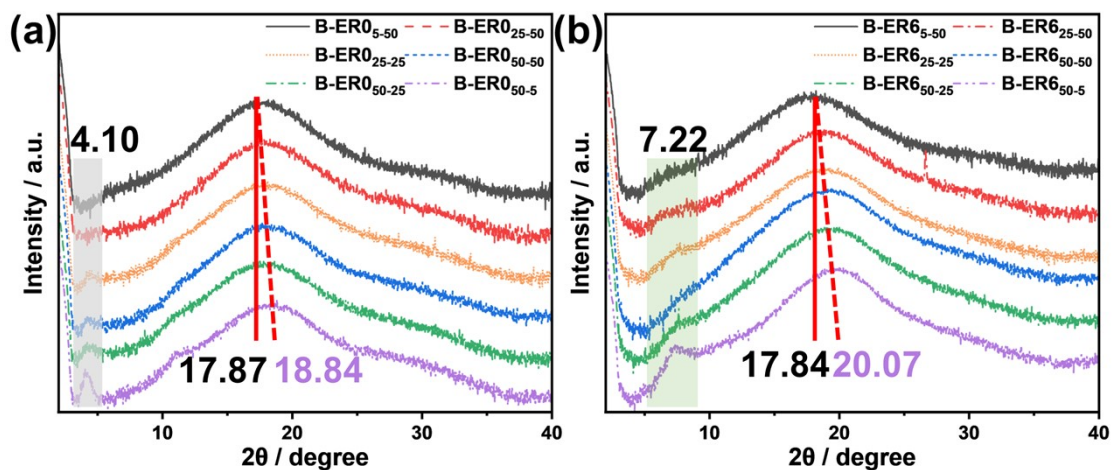

Fig. S19. WAXD curves of (a) B-ER0<sub>m-n</sub> and (b) B-ER6<sub>m-n</sub>.

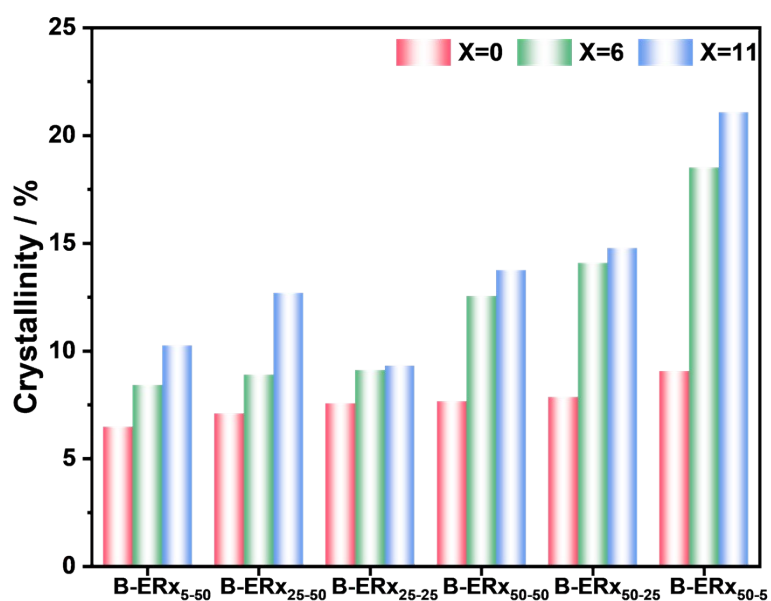

Fig. S20. Crystallinity of B-ERx<sub>m-n</sub>.

Table S7. Crystalline grain structure and  $\lambda$  values for B-ERx<sub>m-n</sub> and R-ER11<sub>50-50</sub>.

| Samples                | $d_1^{[a]}$ / Å | $d_2^{[a]}$ / Å | $\lambda$ / W/(m·K) |
|------------------------|-----------------|-----------------|---------------------|
| B-ER0 <sub>5-50</sub>  | 4.96            | /               | $0.26 \pm 0.0062$   |
| B-ER0 <sub>25-50</sub> | 4.95            | /               | $0.27 \pm 0.0037$   |
| B-ER0 <sub>25-25</sub> | 4.86            | 21.53           | $0.27 \pm 0.0045$   |
| B-ER0 <sub>50-50</sub> | 4.81            | 21.53           | $0.27 \pm 0.0022$   |
| B-ER0 <sub>50-25</sub> | 4.78            | 21.53           | $0.28 \pm 0.0051$   |
| B-ER0 <sub>50-5</sub>  | 4.71            | 21.53           | $0.30 \pm 0.0054$   |
| -----                  |                 |                 |                     |
| B-ER6 <sub>5-50</sub>  | 4.97            | /               | $0.29 \pm 0.0018$   |
| B-ER6 <sub>25-50</sub> | 4.74            | /               | $0.32 \pm 0.0024$   |

**Table S7.** Crystalline grain structure and  $\lambda$  values for B-ER $x_{m-n}$  and R-ER11 $_{50-50}$  (Continued).

| Samples           | $d_1^{[a]} / \text{\AA}$ | $d_2^{[a]} / \text{\AA}$ | $\lambda / W / (\text{m}\cdot\text{K})$ |
|-------------------|--------------------------|--------------------------|-----------------------------------------|
| B-ER6 $_{25-25}$  | 4.64                     | /                        | $0.28 \pm 0.0039$                       |
| B-ER6 $_{50-50}$  | 4.58                     | /                        | $0.33 \pm 0.0037$                       |
| B-ER6 $_{50-25}$  | 4.48                     | 12.23                    | $0.34 \pm 0.0028$                       |
| B-ER6 $_{50-5}$   | 4.42                     | 12.23                    | $0.36 \pm 0.0036$                       |
| -----             |                          |                          |                                         |
| B-ER11 $_{5-50}$  | 4.95                     | 16.44                    | $0.32 \pm 0.0041$                       |
| B-ER11 $_{25-50}$ | 4.72                     | 16.44                    | $0.33 \pm 0.0023$                       |
| B-ER11 $_{25-25}$ | 4.56                     | 16.44                    | $0.30 \pm 0.0029$                       |
| B-ER11 $_{50-50}$ | 4.51                     | 16.44                    | $0.37 \pm 0.0052$                       |
| R-ER11 $_{50-50}$ | 4.62                     | 16.44                    | $0.29 \pm 0.0032$                       |
| B-ER11 $_{50-25}$ | 4.41                     | 16.44                    | $0.35 \pm 0.0026$                       |
| B-ER11 $_{50-5}$  | 4.38                     | 16.44                    | $0.39 \pm 0.0036$                       |

<sup>[a]</sup>Determined based on the WAXD results.

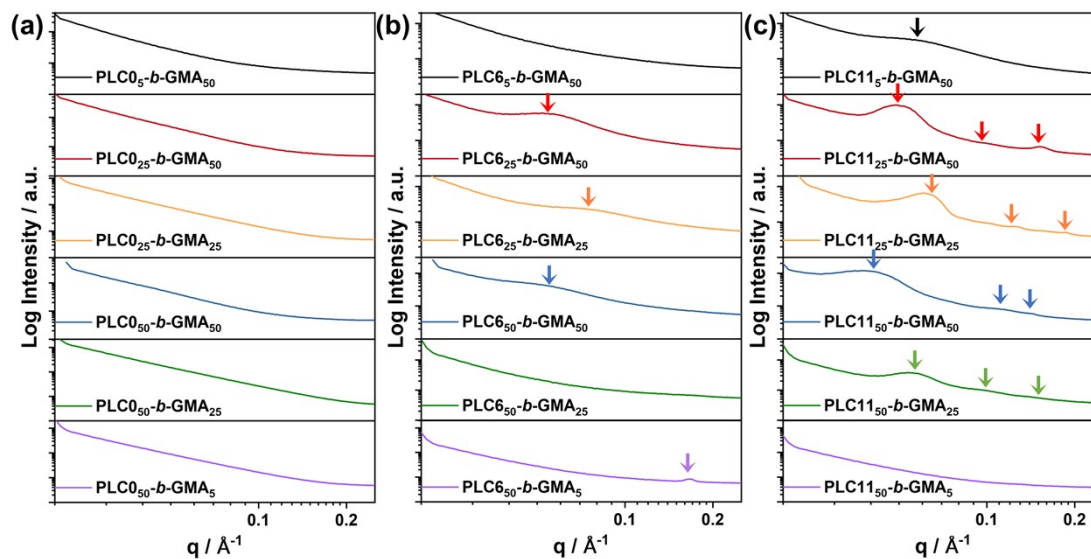

**Fig. S21.** SAXS curves of (a) PLC $0_m$ - $b$ -PGMA $_n$ , (b) PLC $6_m$ - $b$ -PGMA $_n$ , and (c) PLC $11_m$ - $b$ -PGMA $_n$ .

**Table S8.** SAXS peak positions for PLC<sub>x<sub>m</sub></sub>-*b*-PGMA<sub>n</sub> and B-ER11<sub>m-n</sub>.

| Samples                                            | Peak           | $q / \text{\AA}^{-1}$ | $q/q_1$ | Canonical Ratio | Deviation | FWHM / $\text{\AA}^{-1}$ | Amplitude / a.u.     | Lattice parameter / nm | Phase structure   |
|----------------------------------------------------|----------------|-----------------------|---------|-----------------|-----------|--------------------------|----------------------|------------------------|-------------------|
| PLC11 <sub>25</sub> - <i>b</i> -PGMA <sub>50</sub> | q <sub>1</sub> | 0.04959               | 1       | 1               | \         | 0.013                    | $4.7 \times 10^{-3}$ | 14.6                   | HEX-like          |
|                                                    | q <sub>2</sub> | 0.09012               | 1.82    | $\sqrt{3}$      | +5.1%     | 0.034                    | $7.2 \times 10^{-5}$ |                        |                   |
|                                                    | q <sub>3</sub> | 0.15219               | 3.07    | 3               | +2.3%     | 0.019                    | $3.6 \times 10^{-5}$ |                        |                   |
| PLC11 <sub>25</sub> - <i>b</i> -PGMA <sub>25</sub> | q <sub>1</sub> | 0.05851               | 1       | 1               | \         | 0.013                    | $2.8 \times 10^{-3}$ | 10.7                   | LAM-like          |
|                                                    | q <sub>2</sub> | 0.12255               | 2.10    | 2               | +5.0%     | 0.022                    | $7.2 \times 10^{-5}$ |                        |                   |
|                                                    | q <sub>3</sub> | 0.18086               | 3.09    | 3               | +3.0%     | 0.011                    | $6.8 \times 10^{-6}$ |                        |                   |
| PLC11 <sub>50</sub> - <i>b</i> -PGMA <sub>50</sub> | q <sub>1</sub> | 0.04001               | 1       | 1               | \         | 0.019                    | $6.9 \times 10^{-3}$ | 15.6                   | LAM-like          |
|                                                    | q <sub>2</sub> | 0.11318               | 2.83    | 3               | -5.7%     | 0.053                    | $4.2 \times 10^{-4}$ |                        |                   |
|                                                    | q <sub>3</sub> | 0.14912               | 3.73    | 4               | -6.8%     | 0.014                    | $1.2 \times 10^{-5}$ |                        |                   |
| PLC11 <sub>50</sub> - <i>b</i> -PGMA <sub>25</sub> | q <sub>1</sub> | 0.05507               | 1       | 1               | \         | 0.015                    | $9.5 \times 10^{-4}$ | 13.2                   | Inverted HEX-like |
|                                                    | q <sub>2</sub> | 0.09315               | 1.69    | $\sqrt{3}$      | -2.4%     | 0.018                    | $5.7 \times 10^{-5}$ |                        |                   |
|                                                    | q <sub>3</sub> | 0.13764               | 2.50    | $\sqrt{7}$      | -5.5%     | 0.016                    | $1.3 \times 10^{-5}$ |                        |                   |
| B-ER11 <sub>25-50</sub>                            | q <sub>1</sub> | 0.04578               | 1       | 1               | \         | 0.018                    | $2.5 \times 10^{-3}$ | 15.8                   | HEX-like          |
|                                                    | q <sub>2</sub> | 0.08362               | 1.83    | $\sqrt{3}$      | +5.4%     | 0.044                    | $1.1 \times 10^{-4}$ |                        |                   |
|                                                    | q <sub>3</sub> | 0.1384                | 3.02    | 3               | +0.8%     | 0.036                    | $3.1 \times 10^{-5}$ |                        |                   |

**Table S8.** SAXS peak positions for PLCx<sub>m</sub>-*b*-PGMA<sub>n</sub> and B-ER11<sub>m-n</sub> (Continued).

| Samples                       | Peak           | q / Å <sup>-1</sup> | q/q <sub>1</sub> | Canonical Ratio | Deviation | FWHM / Å <sup>-1</sup> | Amplitude / a.u.     | Lattice parameter / nm | Phase structure |
|-------------------------------|----------------|---------------------|------------------|-----------------|-----------|------------------------|----------------------|------------------------|-----------------|
| <b>B-ER11<sub>50-50</sub></b> | q <sub>1</sub> | 0.03017             | 1                | 1               | \         | 0.019                  | 6.7×10 <sup>-3</sup> | 20.8                   | LAM-like        |
|                               | q <sub>2</sub> | 0.09322             | 3.09             | 3               | +3.0%     | 0.032                  | 2.0×10 <sup>-4</sup> |                        |                 |
|                               | q <sub>3</sub> | 0.12165             | 4.03             | 4               | +0.8%     | 0.088                  | 1.1×10 <sup>-4</sup> |                        |                 |
| <b>B-ER11<sub>50-25</sub></b> | q <sub>1</sub> | 0.02584             | 1                | 1               | \         | 0.026                  | 3.9×10 <sup>-3</sup> | \                      | \               |
|                               | q <sub>2</sub> | \                   | \                | \               | \         | \                      | \                    |                        |                 |
|                               | q <sub>3</sub> | 0.13334             | 5.16             | \               | \         | 0.044                  | 2.4×10 <sup>-5</sup> |                        |                 |

Determined based on the SAXS results. LAM-like: Lattice parameter =  $2\pi/q_1$ ; HEX-like and inverted HEX-like: Lattice parameter =  $4\pi/(\sqrt{3}q_1)$ ; FWHM: Full width at half maximum.

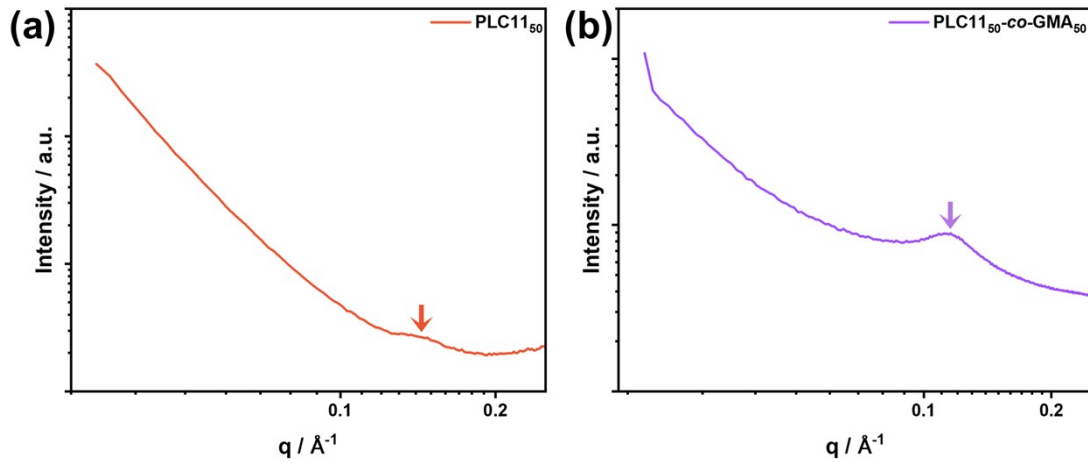

Fig. S22. SAXS curve of (a) PLC11<sub>50</sub> and (b) PLC11<sub>50</sub>-co-PGMA<sub>50</sub>.

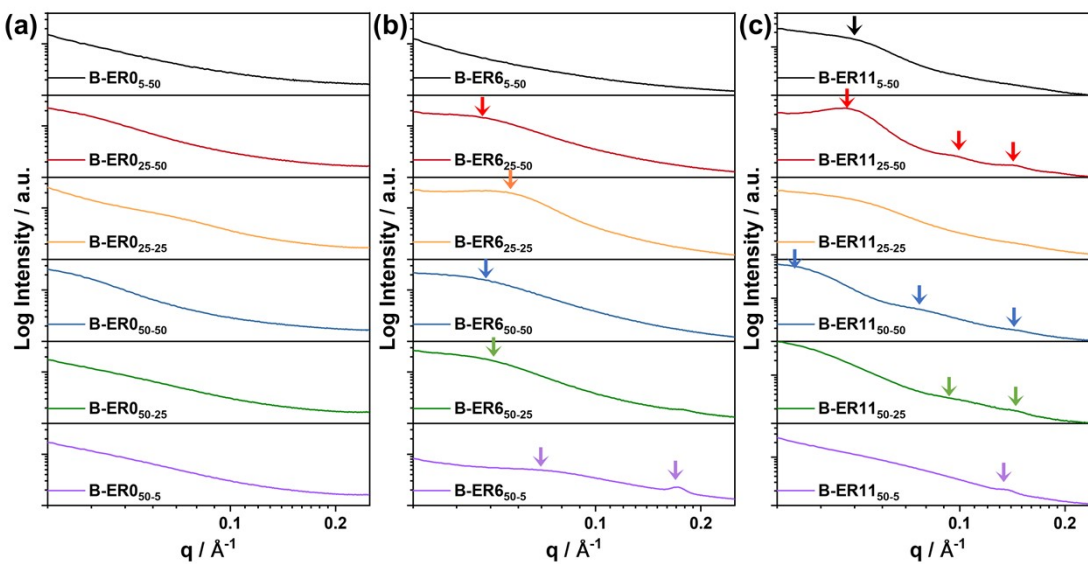

Fig. S23. SAXS curves of (a) B-ER0<sub>m-n</sub>, (b) B-ER6<sub>m-n</sub>, and (c) B-ER11<sub>m-n</sub>.

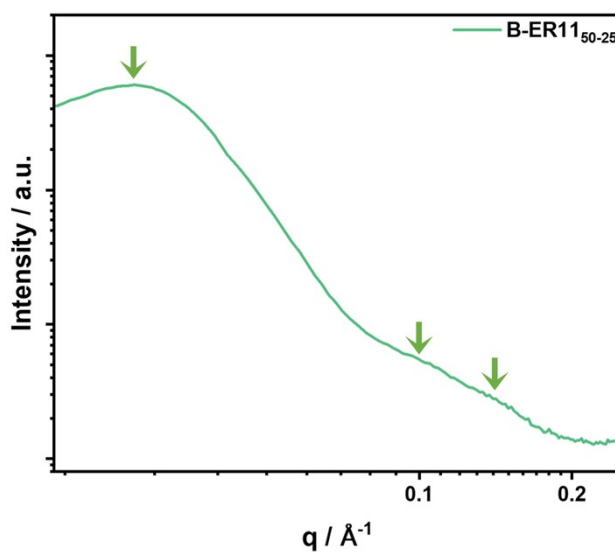

Fig. S24. SAXS curve of B-ER11<sub>50-25</sub> beginning with a lower angle.

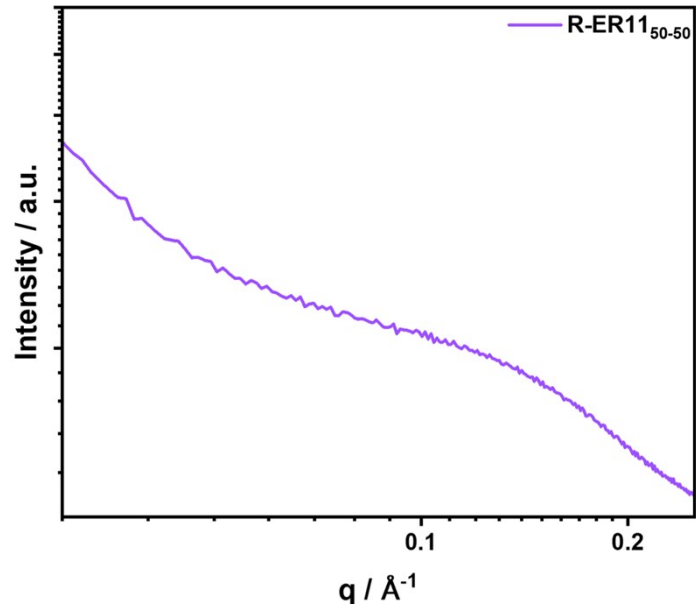

Fig. S25. SAXS curve of R-ER11<sub>50-50</sub>.

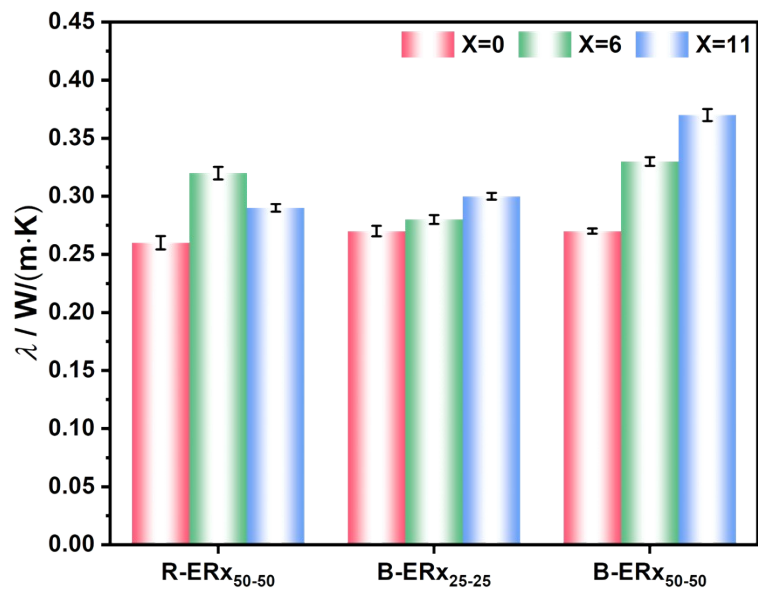

Fig. S26. The  $\lambda$  values of B-ER<sub>x</sub><sub>m-n</sub> comparing with R-ER<sub>x</sub><sub>m-n</sub>.

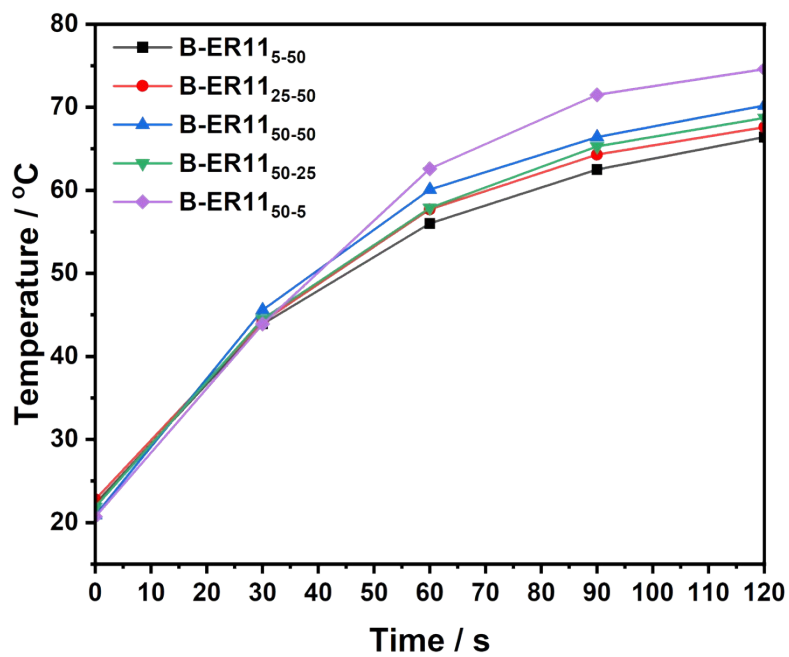

Fig. S27. Surface temperatures at different time for B-ER11<sub>m-n</sub>
